# Supplementary material for: Origin of cancer-associated fibroblasts and tumor-associated macrophages in humans after sex-mismatched bone marrow transplantation
Source: PubMed Central journal article supplement (PMC6123637; doi:10.1038/s42003-018-0137-0), 2018-09-03
Supplement: 42003_2018_137_MOESM1_ESM.pdf [file 42003_2018_137_MOESM1_ESM.pdf]

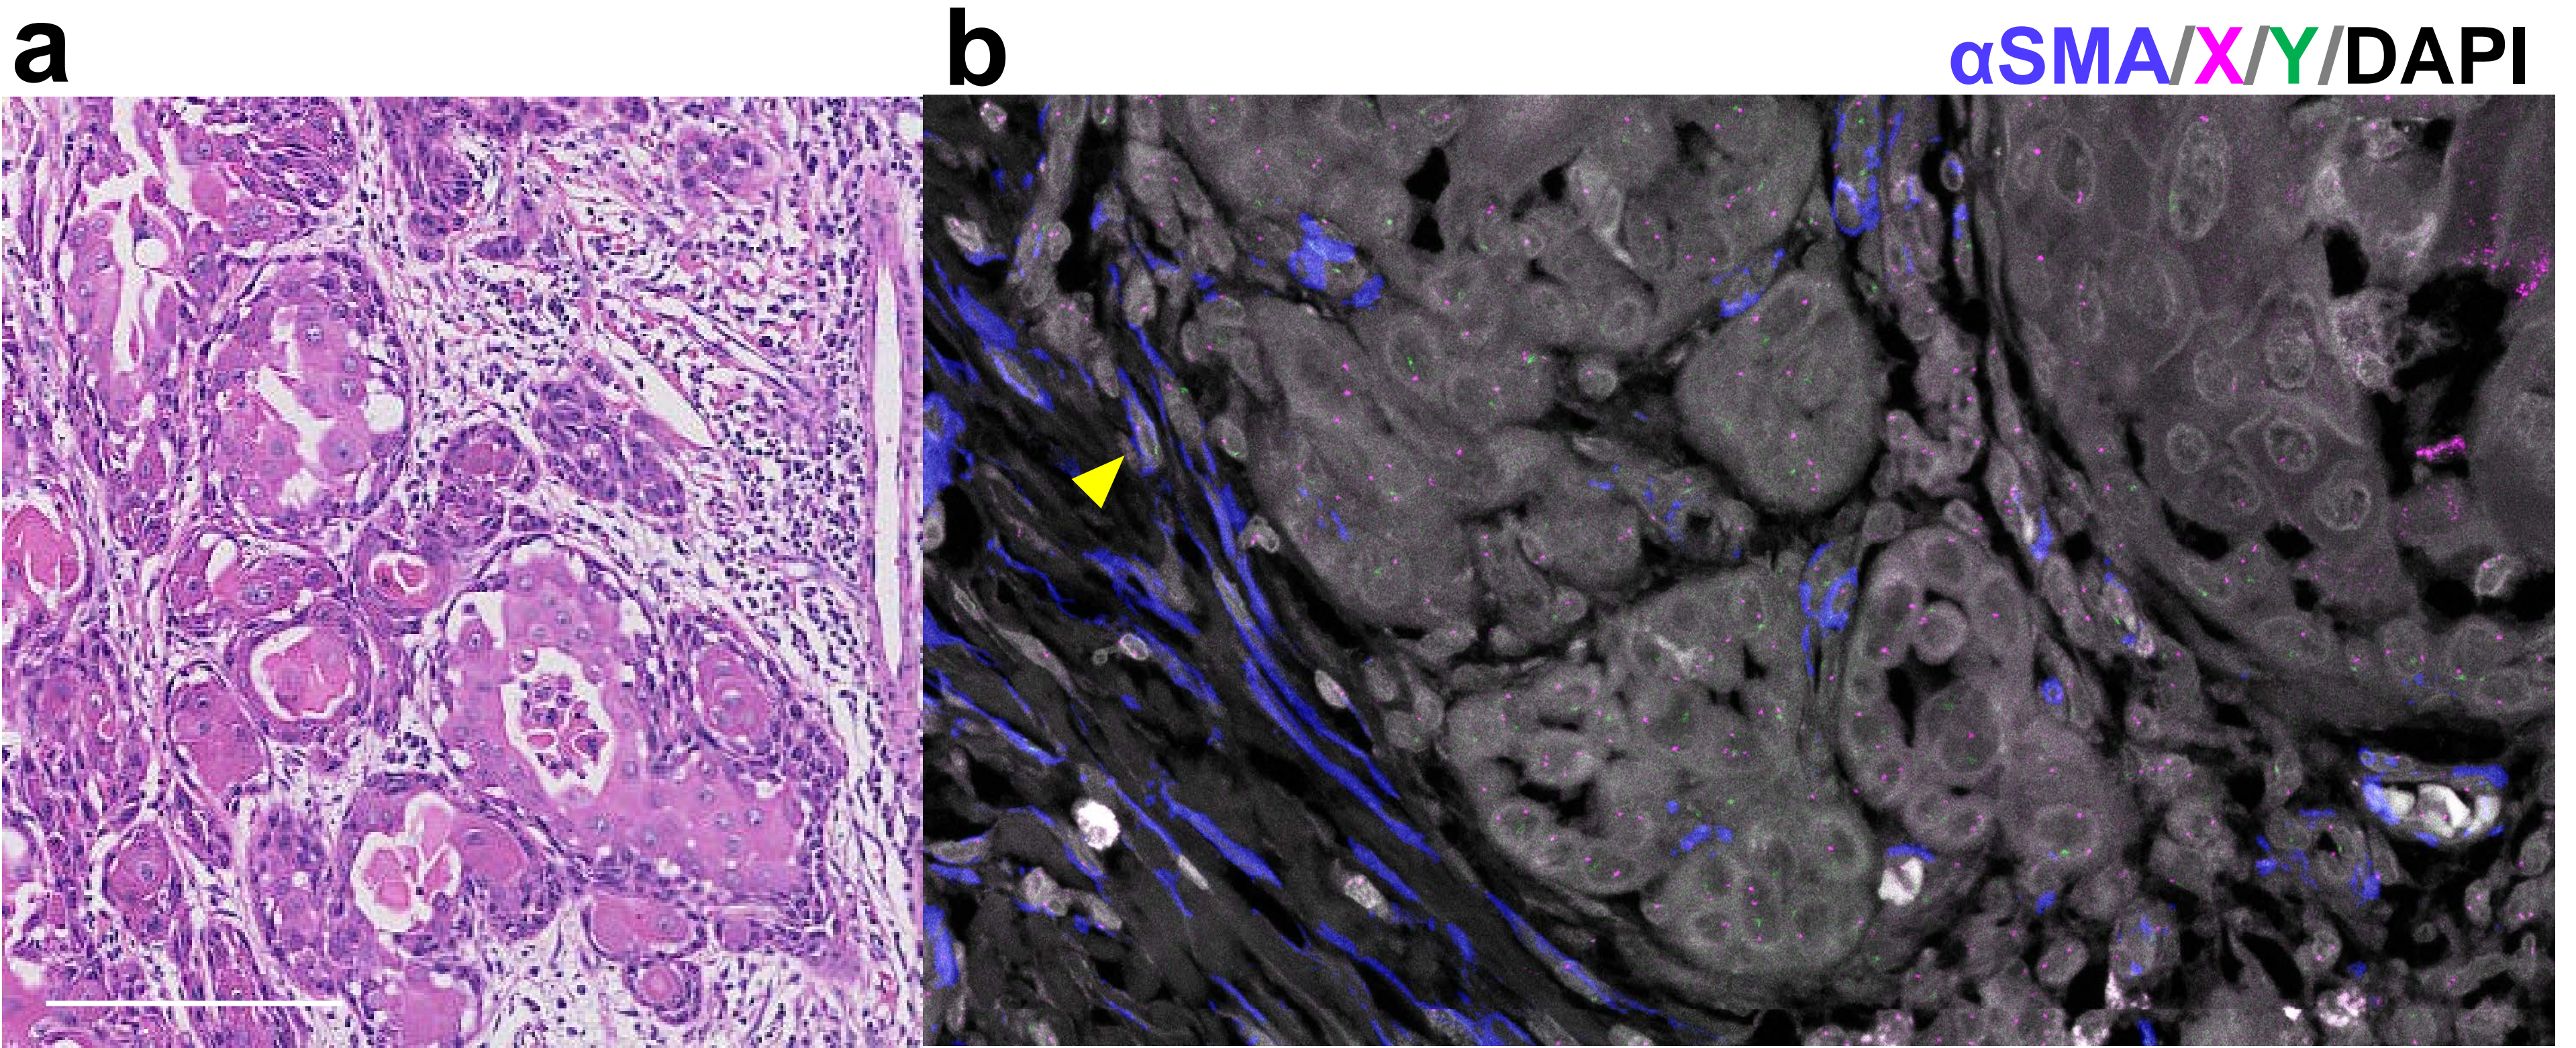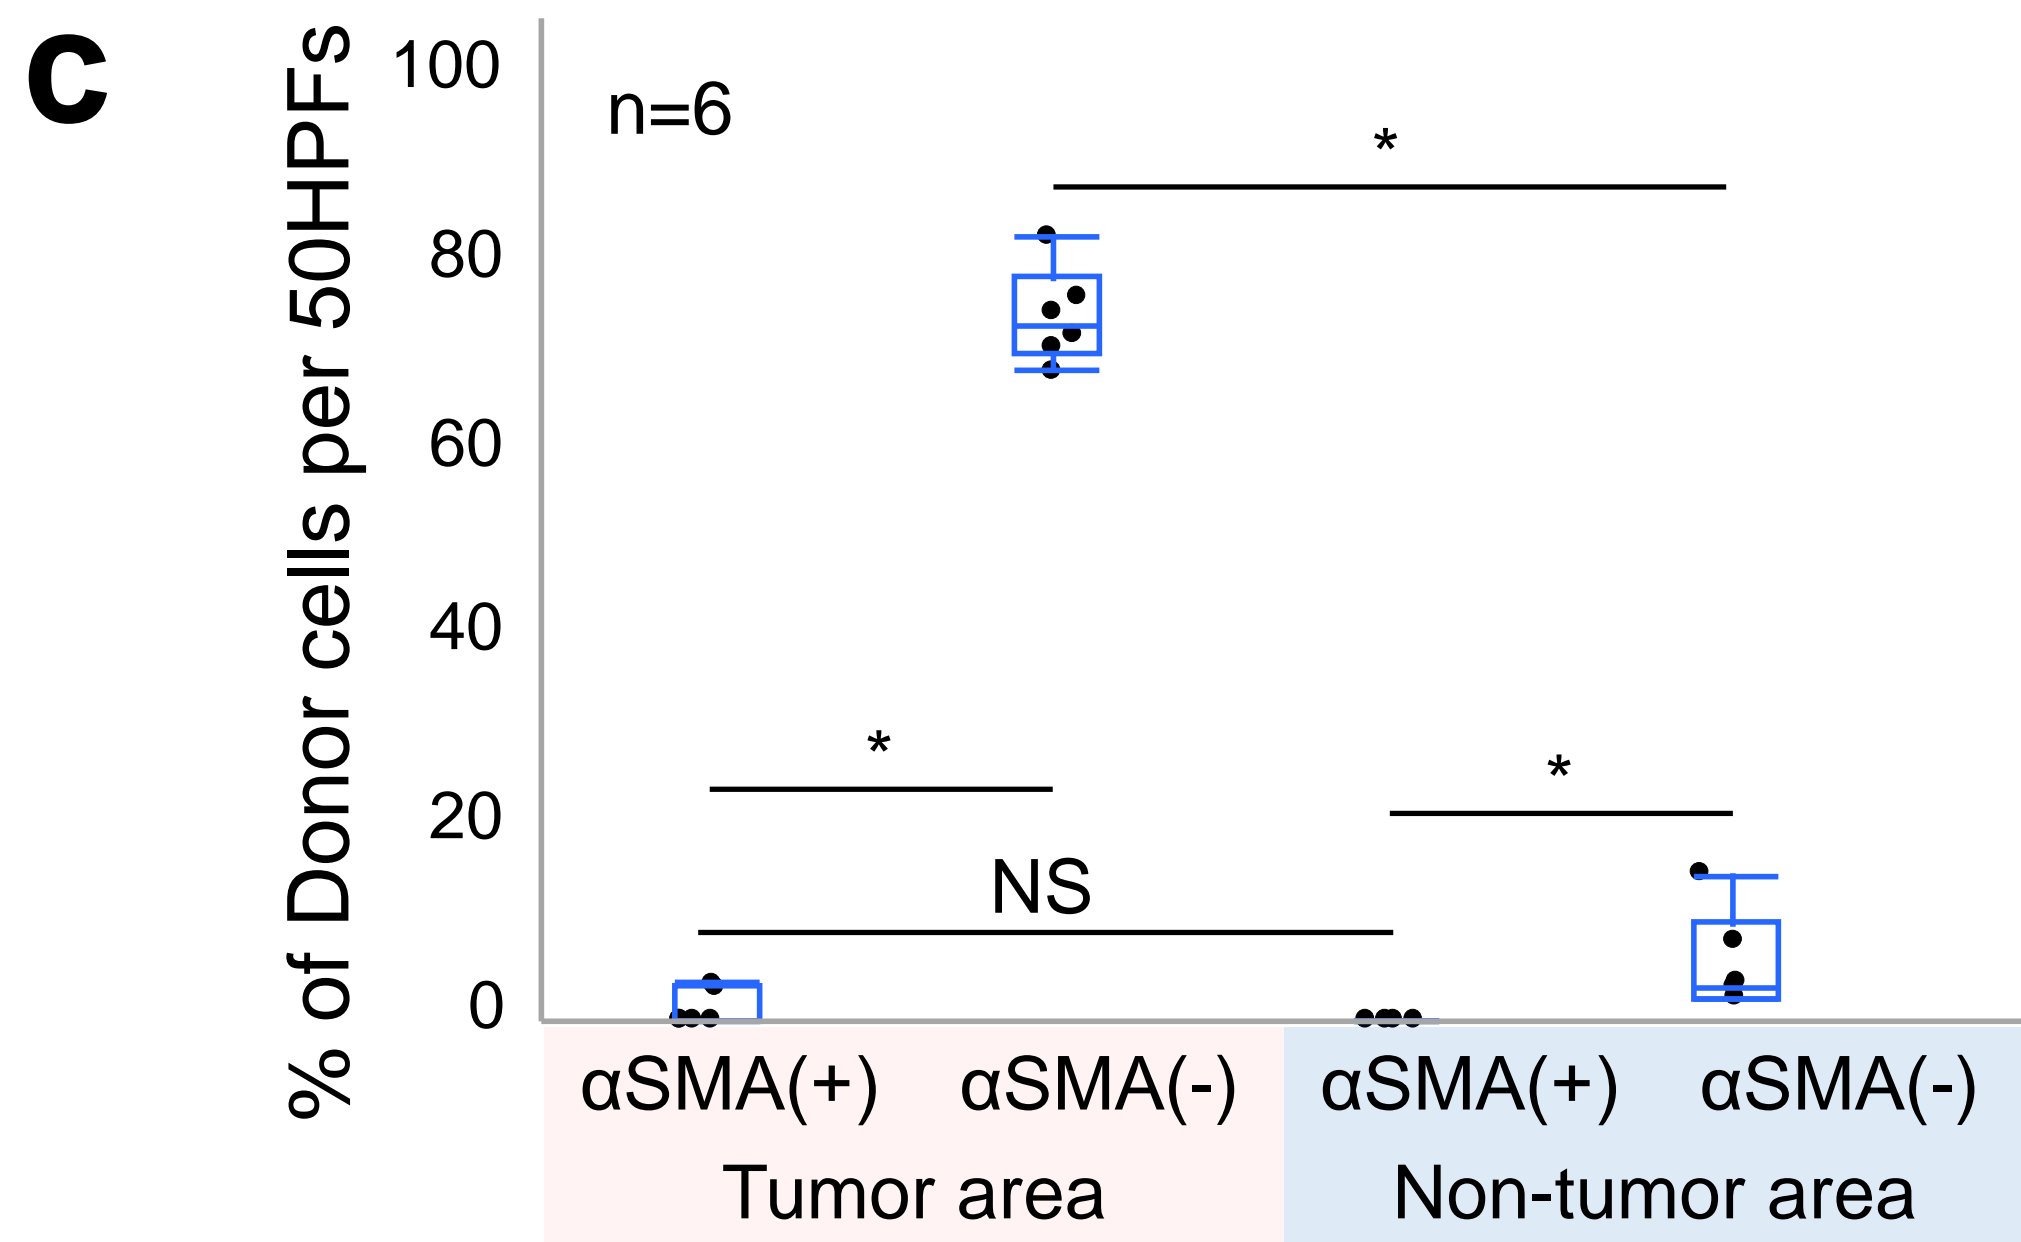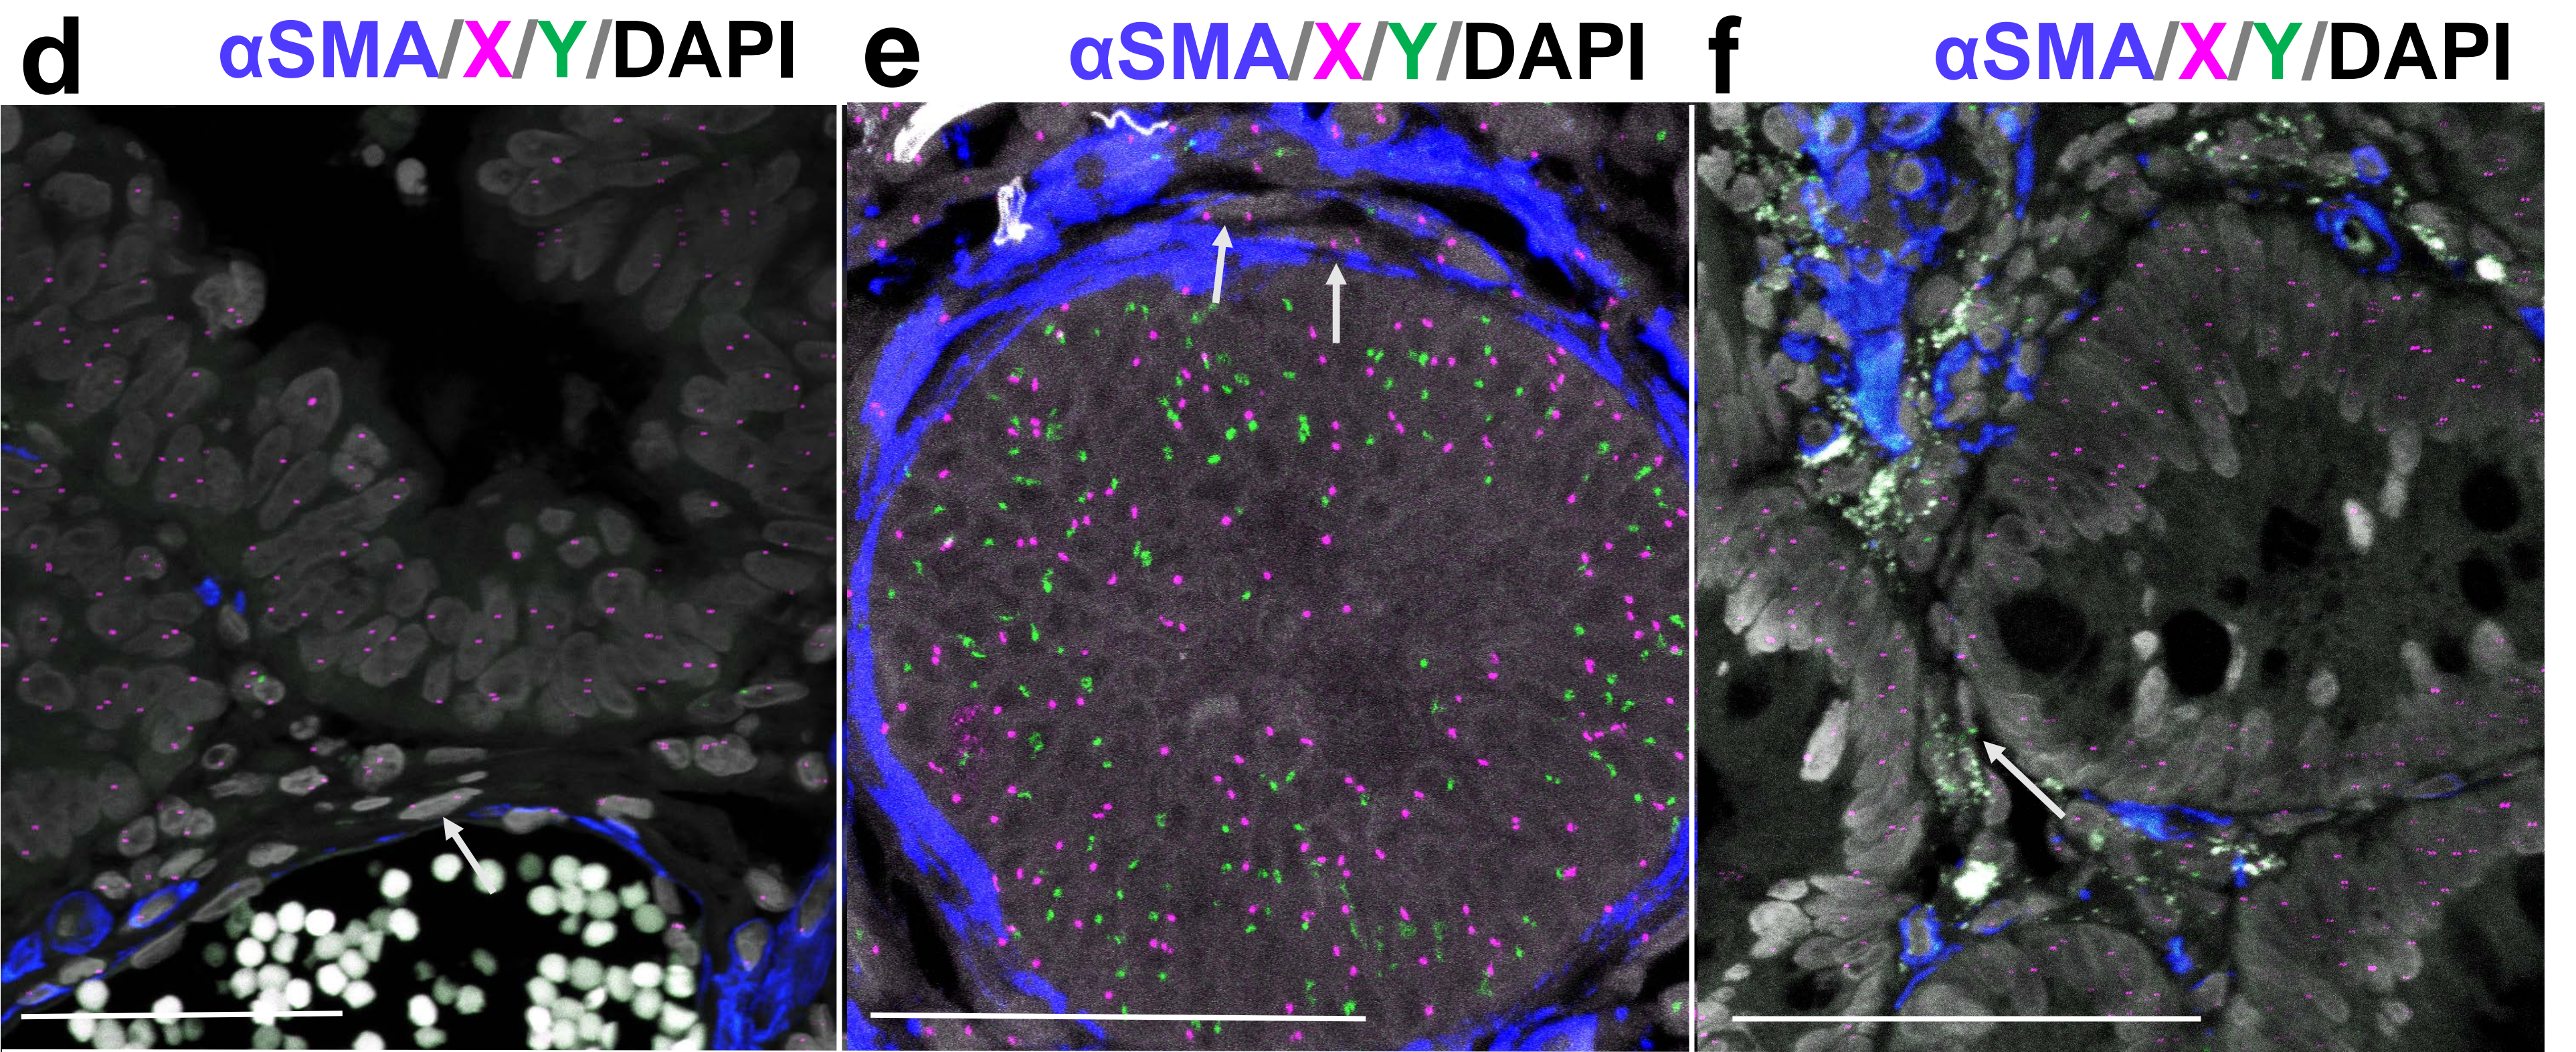

Supplementary Fig. 1. αSMA-ImmunoFISH images of chromosomes X and Y in cases 3–6. αSMA, blue; X, magenta; Y, green; DAPI, gray.

a, H&E specimen of case 3. Scale bar, 200 μm.

b, ImmunoFISH image of case 3. Recipient-derived αSMA(+) SCSSN is indicated by yellow arrowhead. Scale bar, 50 μm.

c, Proportions of donor SCSSNs in six regions of two sections of the tumor and non-tumor areas, as in Fig. 2. The total numbers of cells were as follows: 167 αSMA(+) SCSSNs and 454 αSMA(-) SCSSNs in the tumor area and 1 αSMA(+) SCSSN and 327 αSMA(-) SCSSNs in the non-tumor area. \*p<0.05. NS, not significant (Steel–Dwass).

d, Case 4. Gastric adenocarcinoma in a 67-year-old male. Donor-derived αSMA(-) SCSSN is indicated by white arrow. Scale bar, 50 μm.

e, Case 5. Colon adenocarcinoma in a 68-year-old male. Donor-derived αSMA(-) SCSSNs are indicated by white arrows. Scale bar, 50 μm.

f, Case 6. Colon adenoma with high grade dysplasia in a 58-year-old female. Donor-derived αSMA(-) SCSSN is indicated by white arrow. Scale bar, 50 μm.

**a**  $\alpha$ SMA/HLA-DR/PDGFR $\beta$ /DAPI

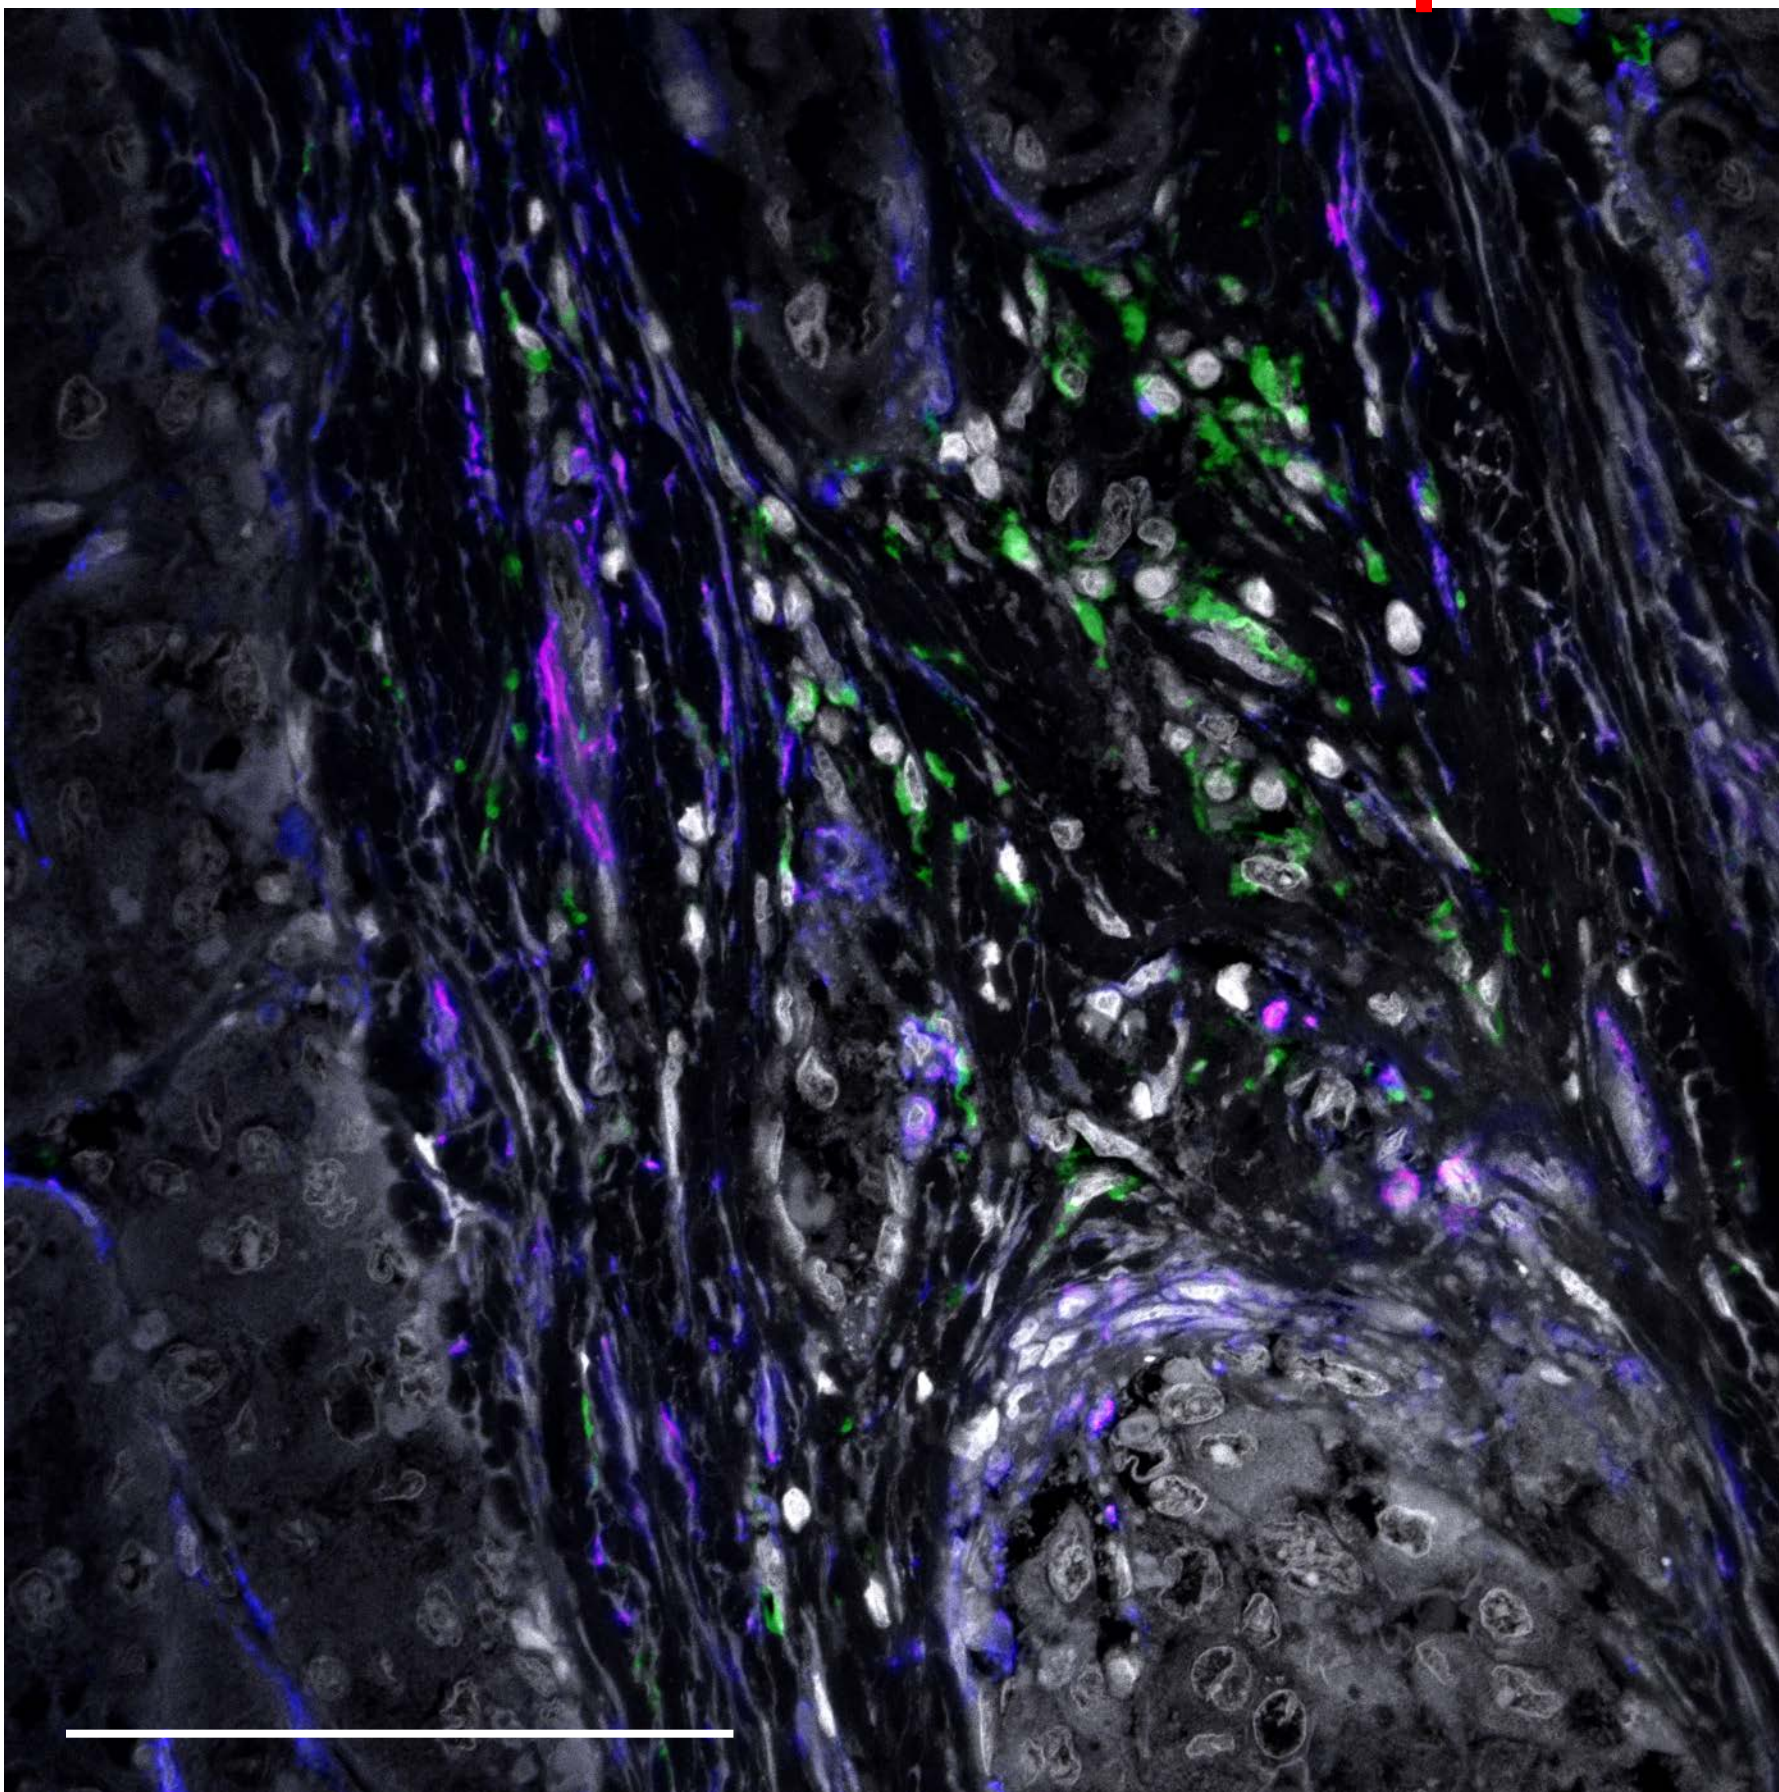

**b** HLA-DR/DAPI

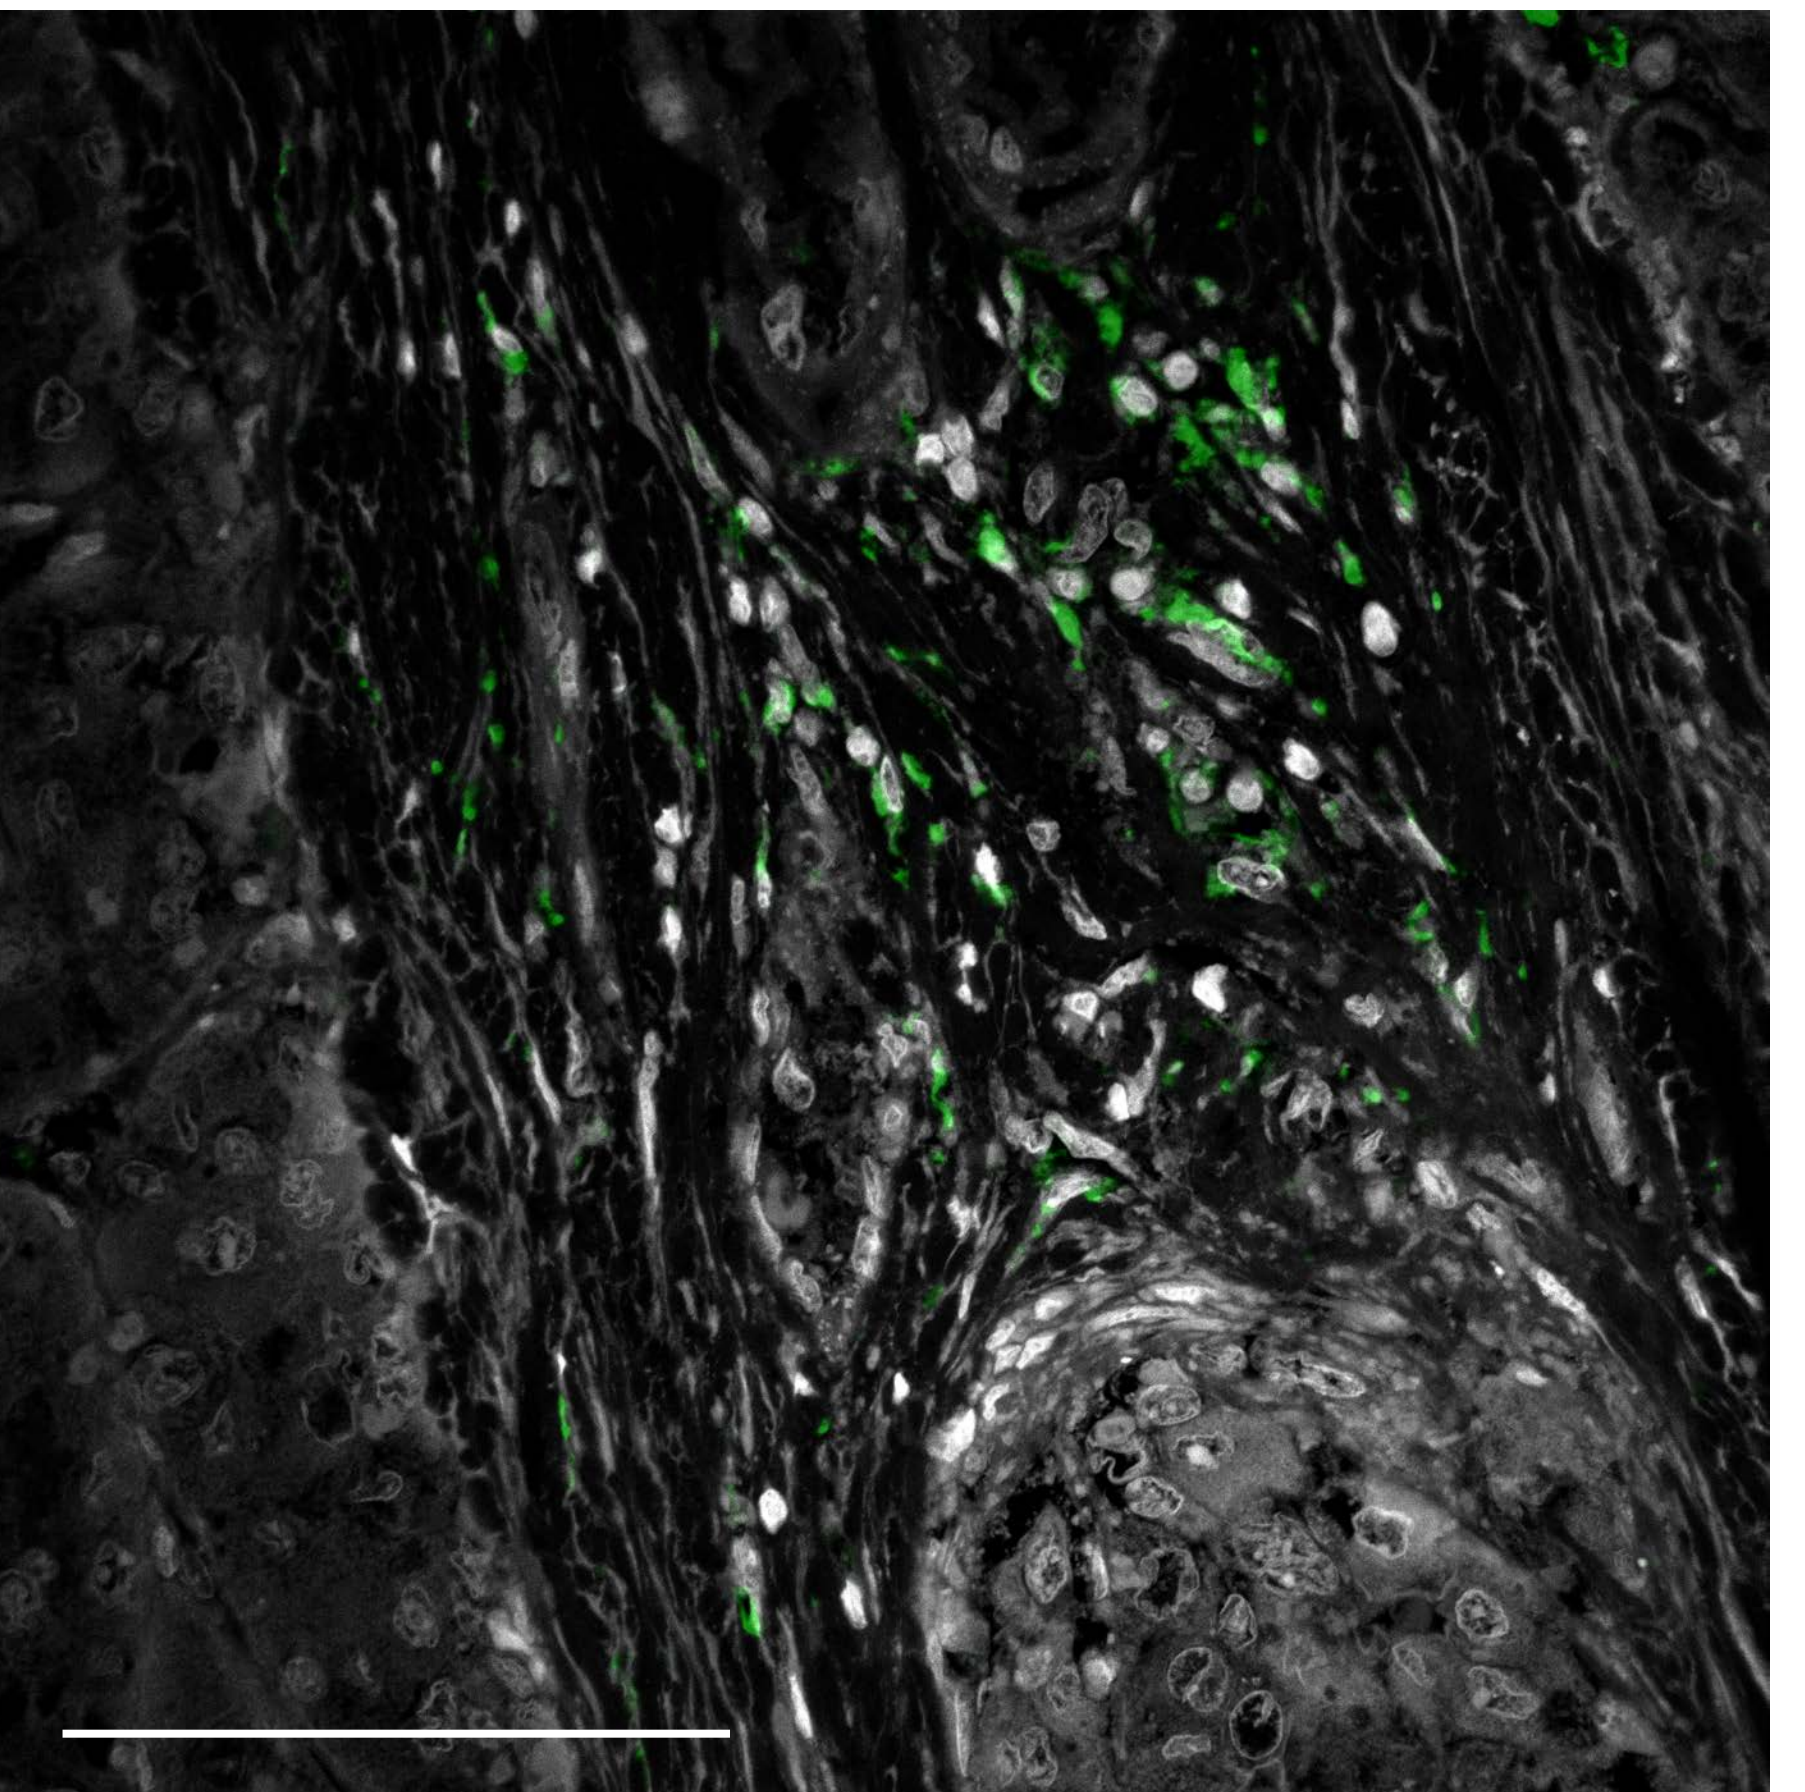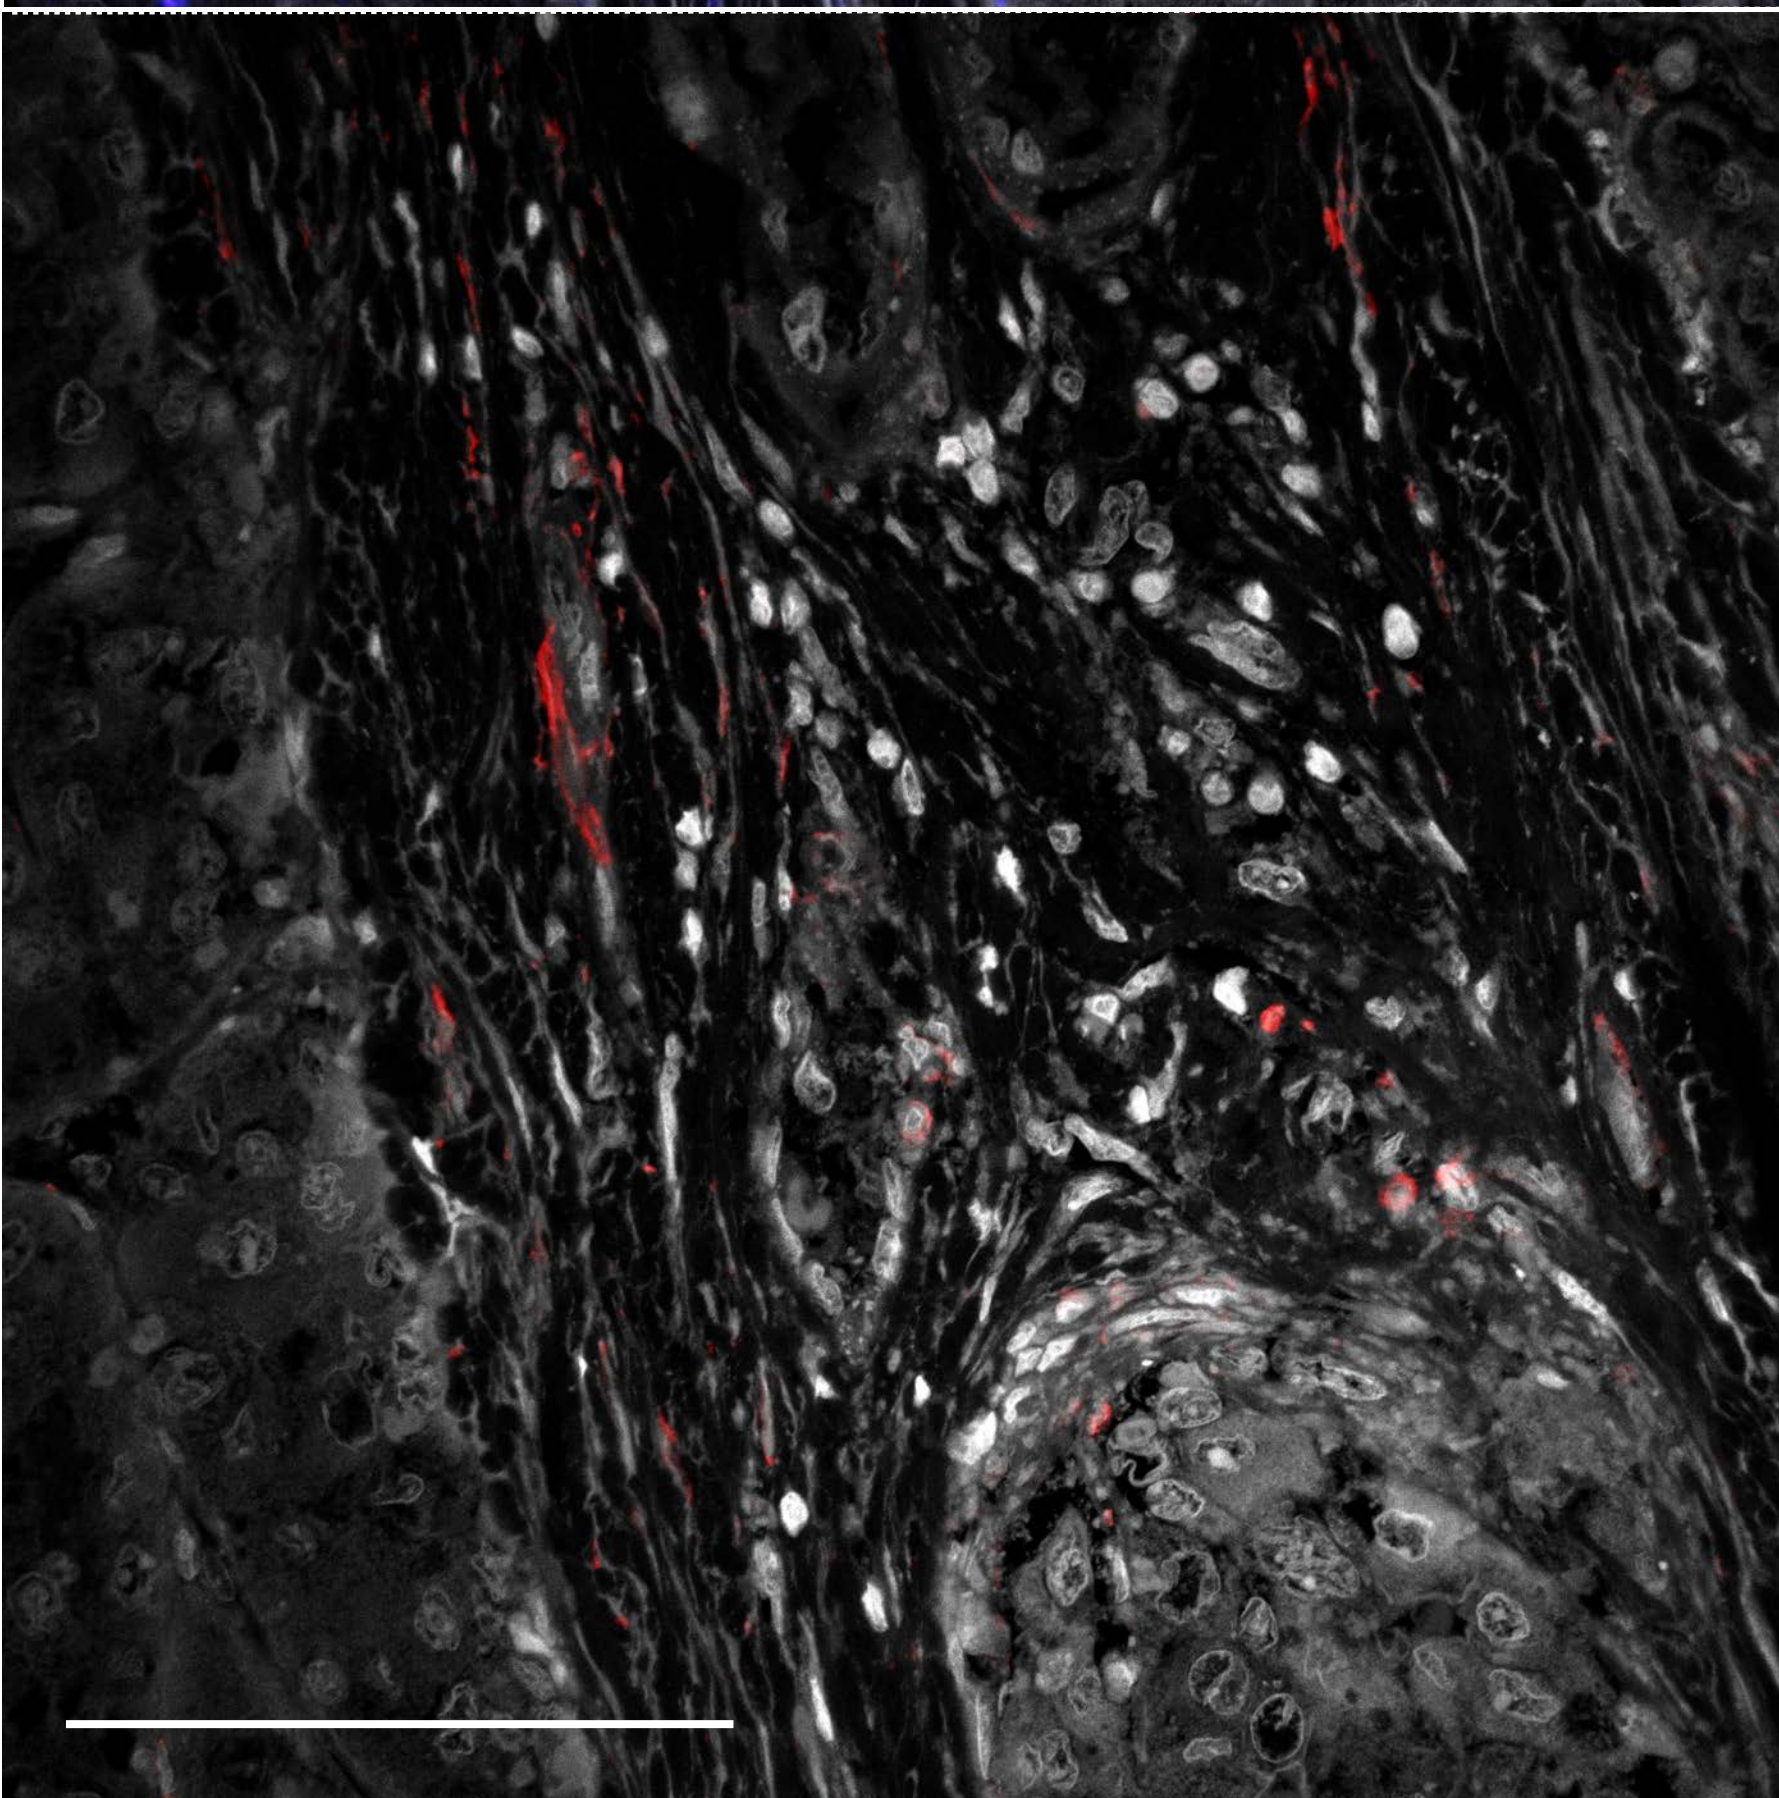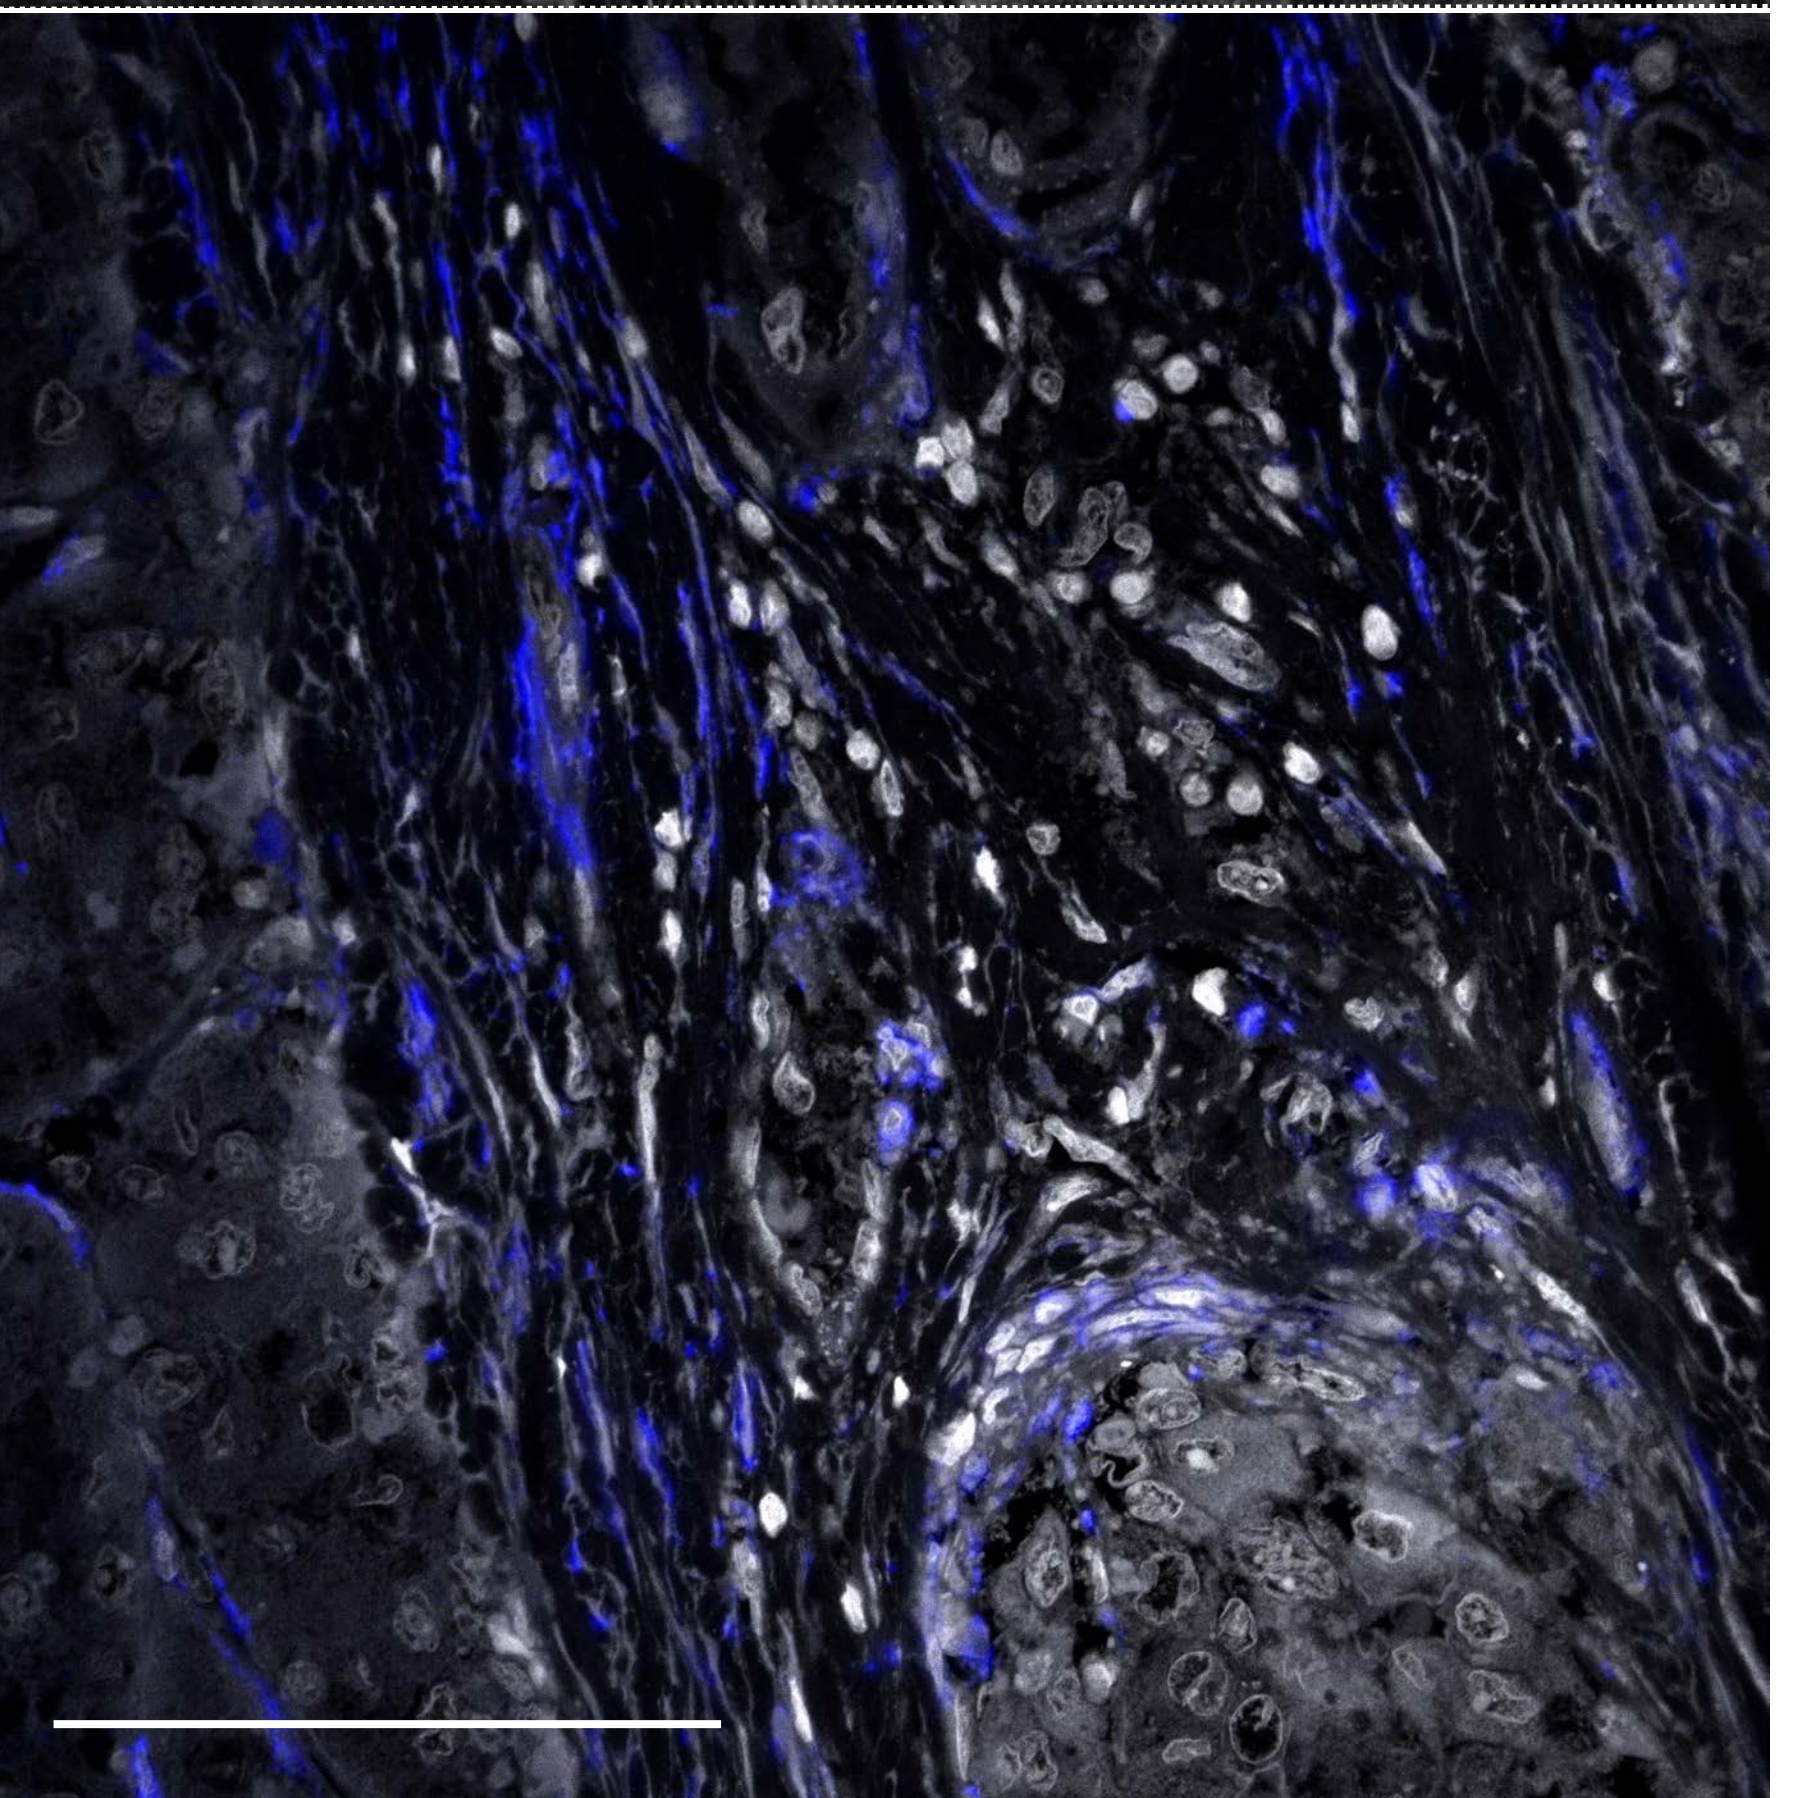

**c** PDGFR $\beta$ /DAPI

**d**  $\alpha$ SMA/DAPI

**e** PDGFR $\beta$ /X/Y/DAPI

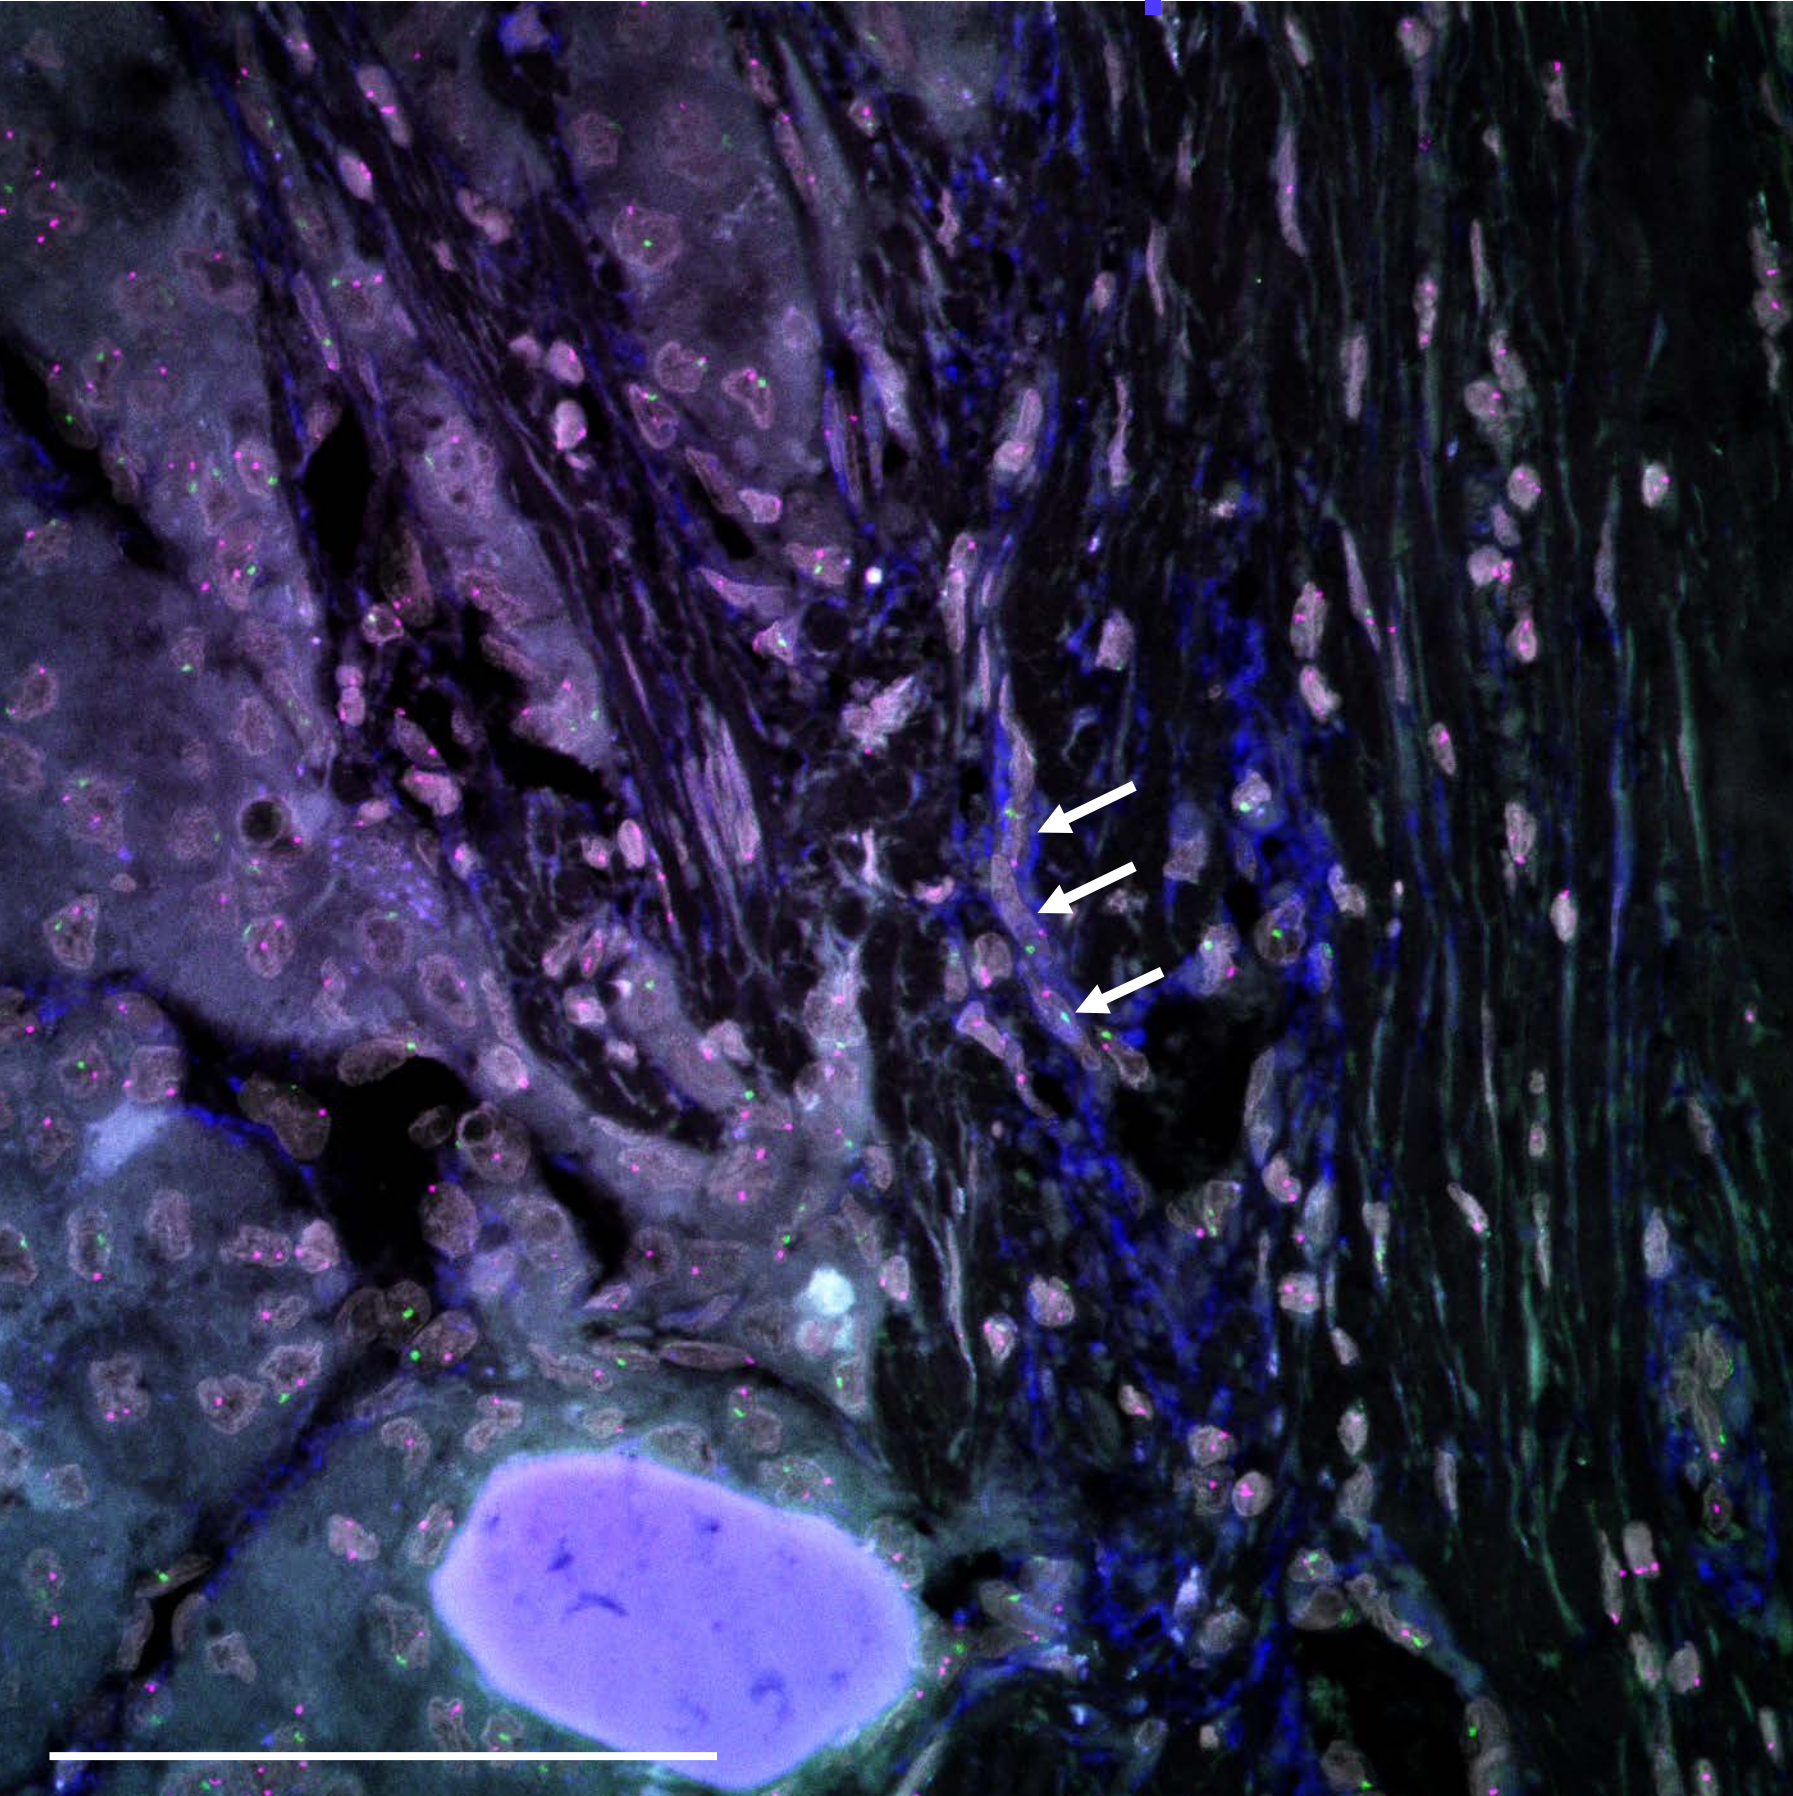

Supplementary Fig. 2 Triple immunostaining and immunofISH for bone marrow stromal cell markers in case 2.

a–d, Triple immunostaining for  $\alpha$ SMA, HLA-DR, and PDGFR $\beta$ . 96% of 106  $\alpha$ SMA(+) SCSSNs in 5 HPFs co-expressed PDGFR $\beta$ . PDGFR $\beta$ (+)  $\alpha$ SMA(-) SCSSNs and  $\alpha$ SMA(+) HLA-DR(+) SCSSNs were sparse (< 1% of the PDGFR $\beta$ (+)SCSSNs,  $\alpha$ SMA(+) in 5 HPFs, respectively; > 100 cells were analyzed). PDGFR $\beta$ , blue; X, red; Y, green; DAPI, gray. Scale bar, 100  $\mu$ m.

e, PDGFR $\beta$ -immunofISH analysis in the tumor specimen. Recipient-derived PDGFR $\beta$ (+) cells are indicated by white arrows. The proportions of donor cells are shown in Fig. 5b. PDGFR $\beta$ , blue; X, magenta; Y, green; DAPI, gray. Scale bar, 100  $\mu$ m.

**a**  $\alpha$ SMA/HLA-DR/PDGFR $\beta$ /DAPI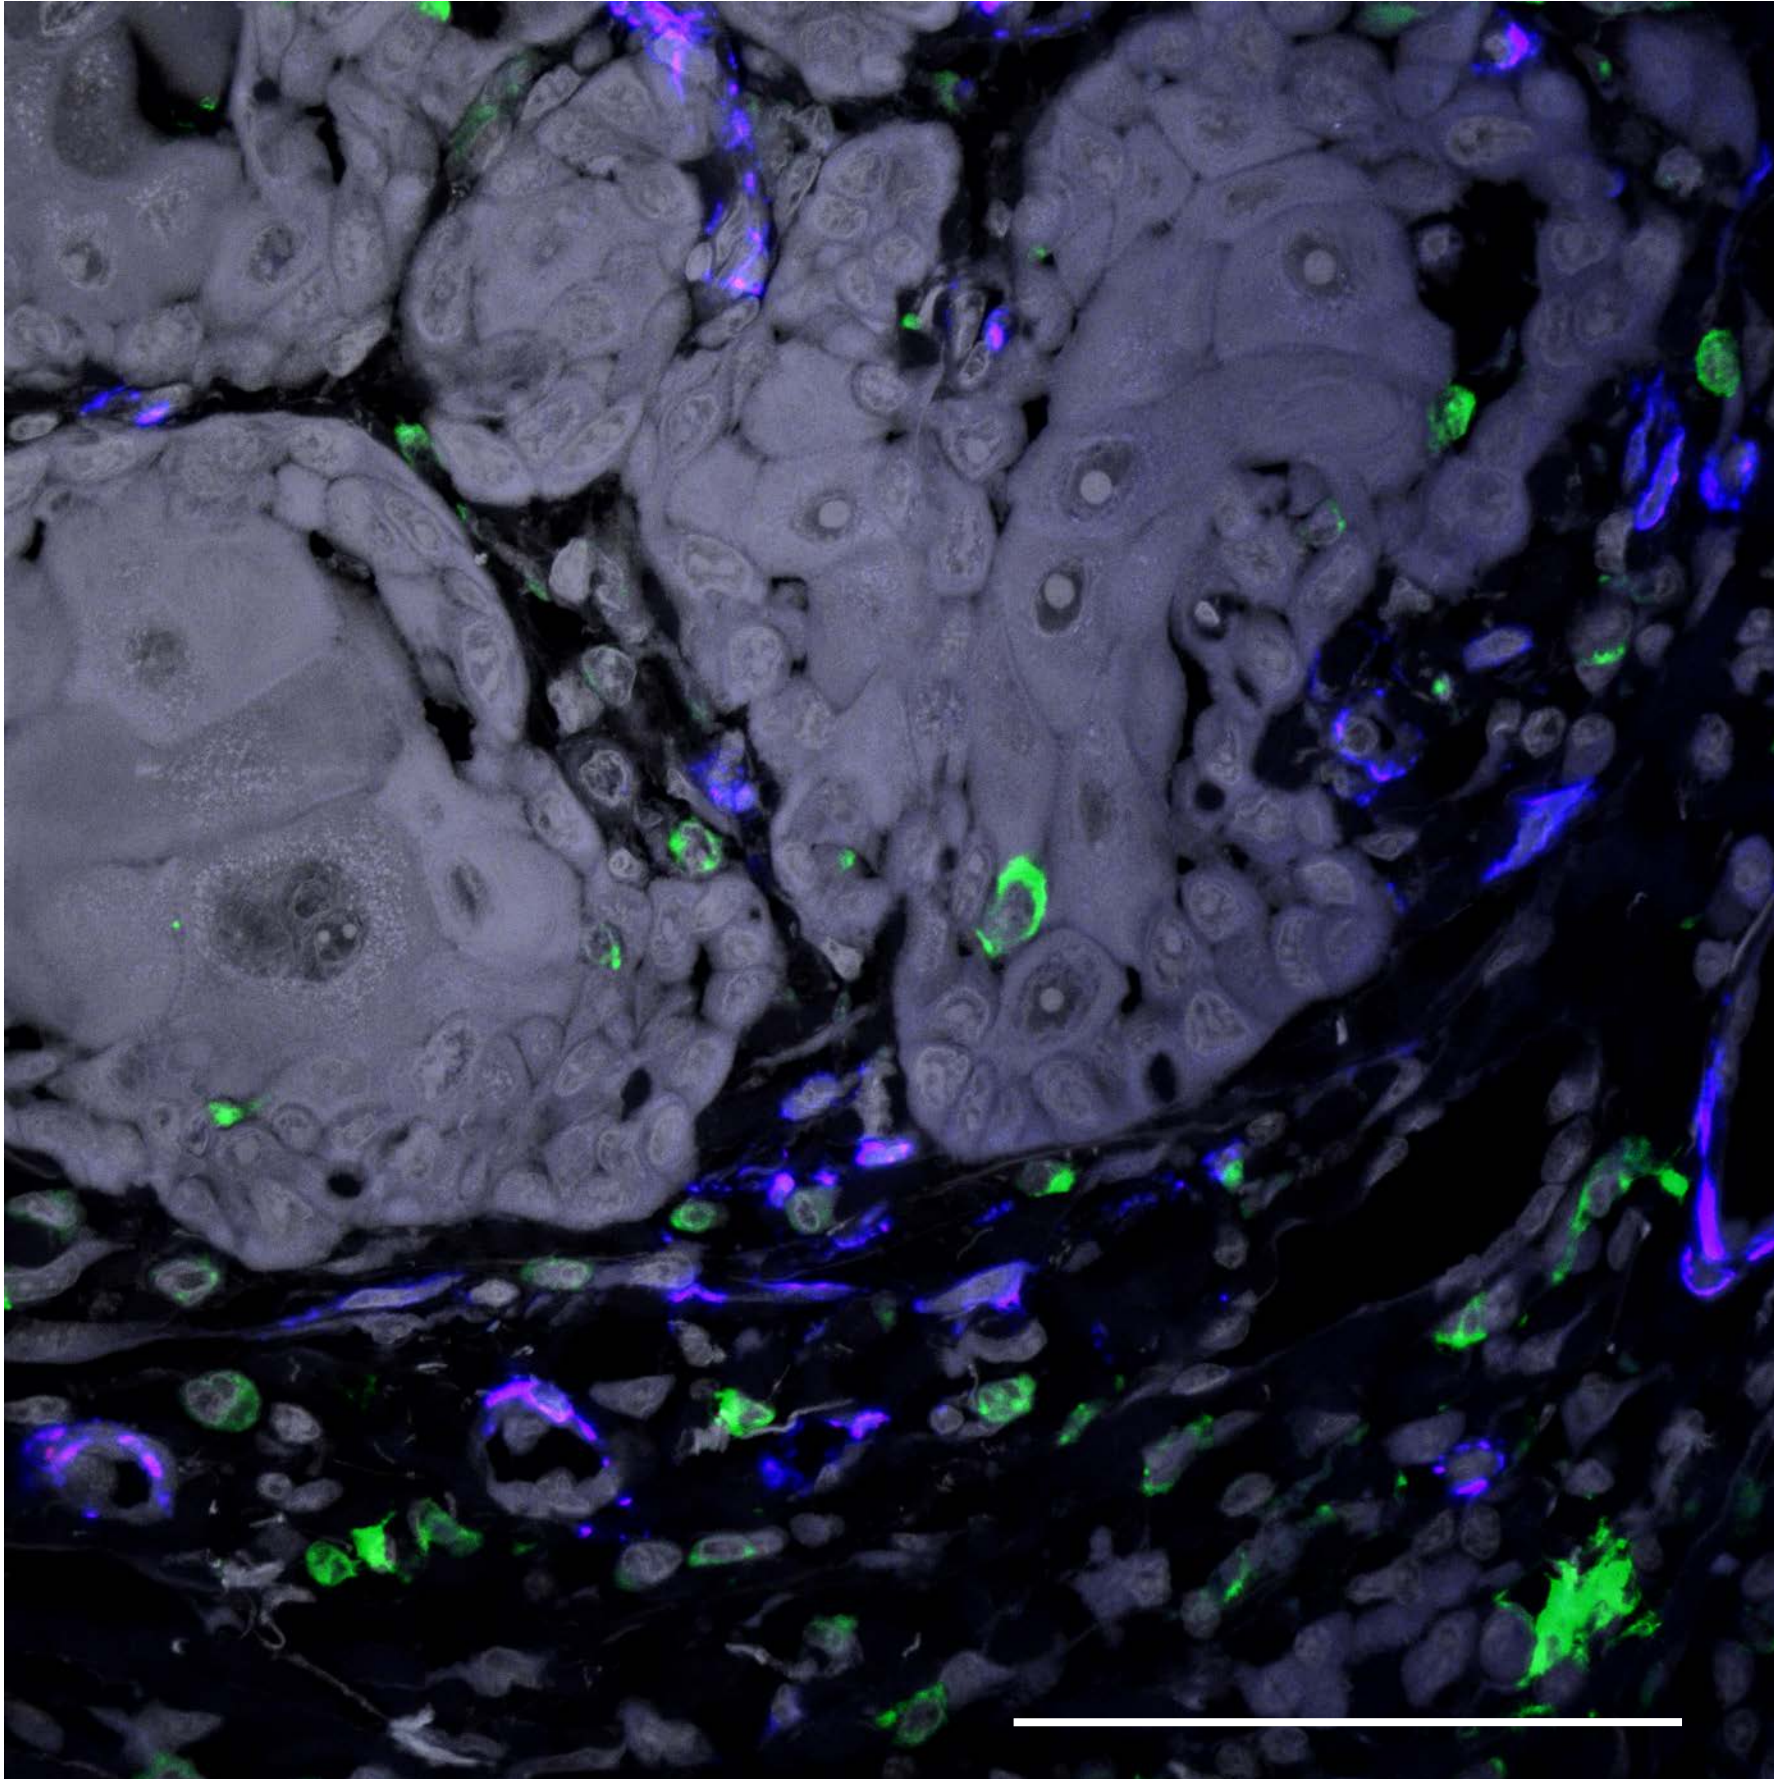**b** HLA-DR/DAPI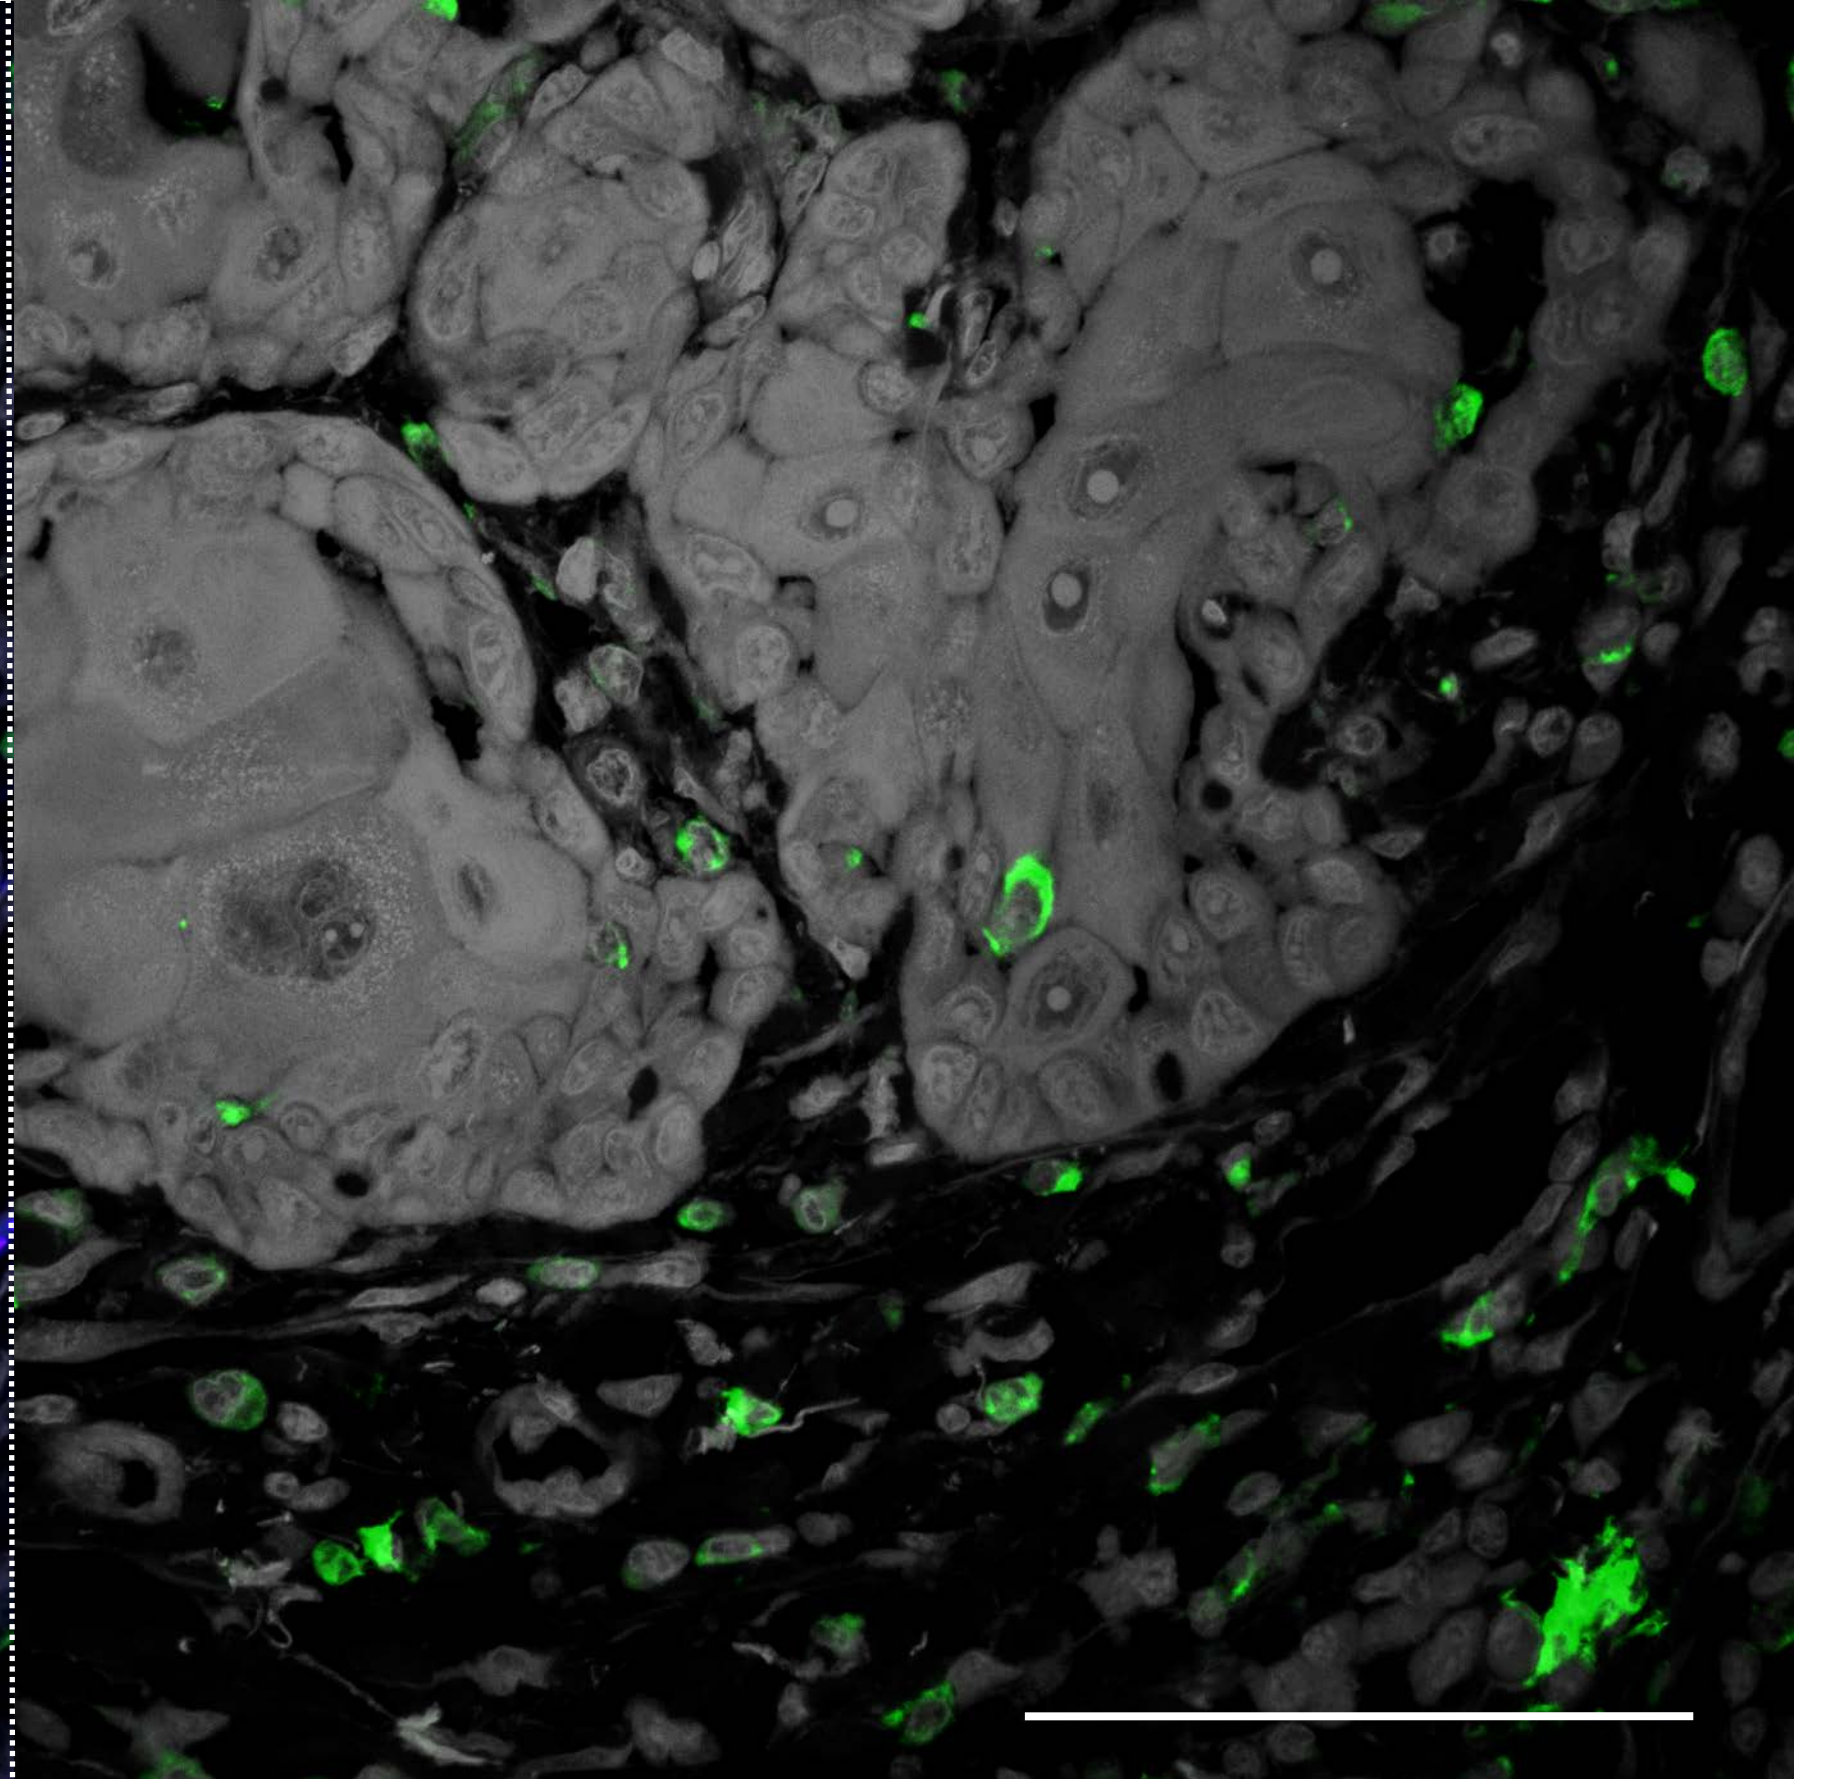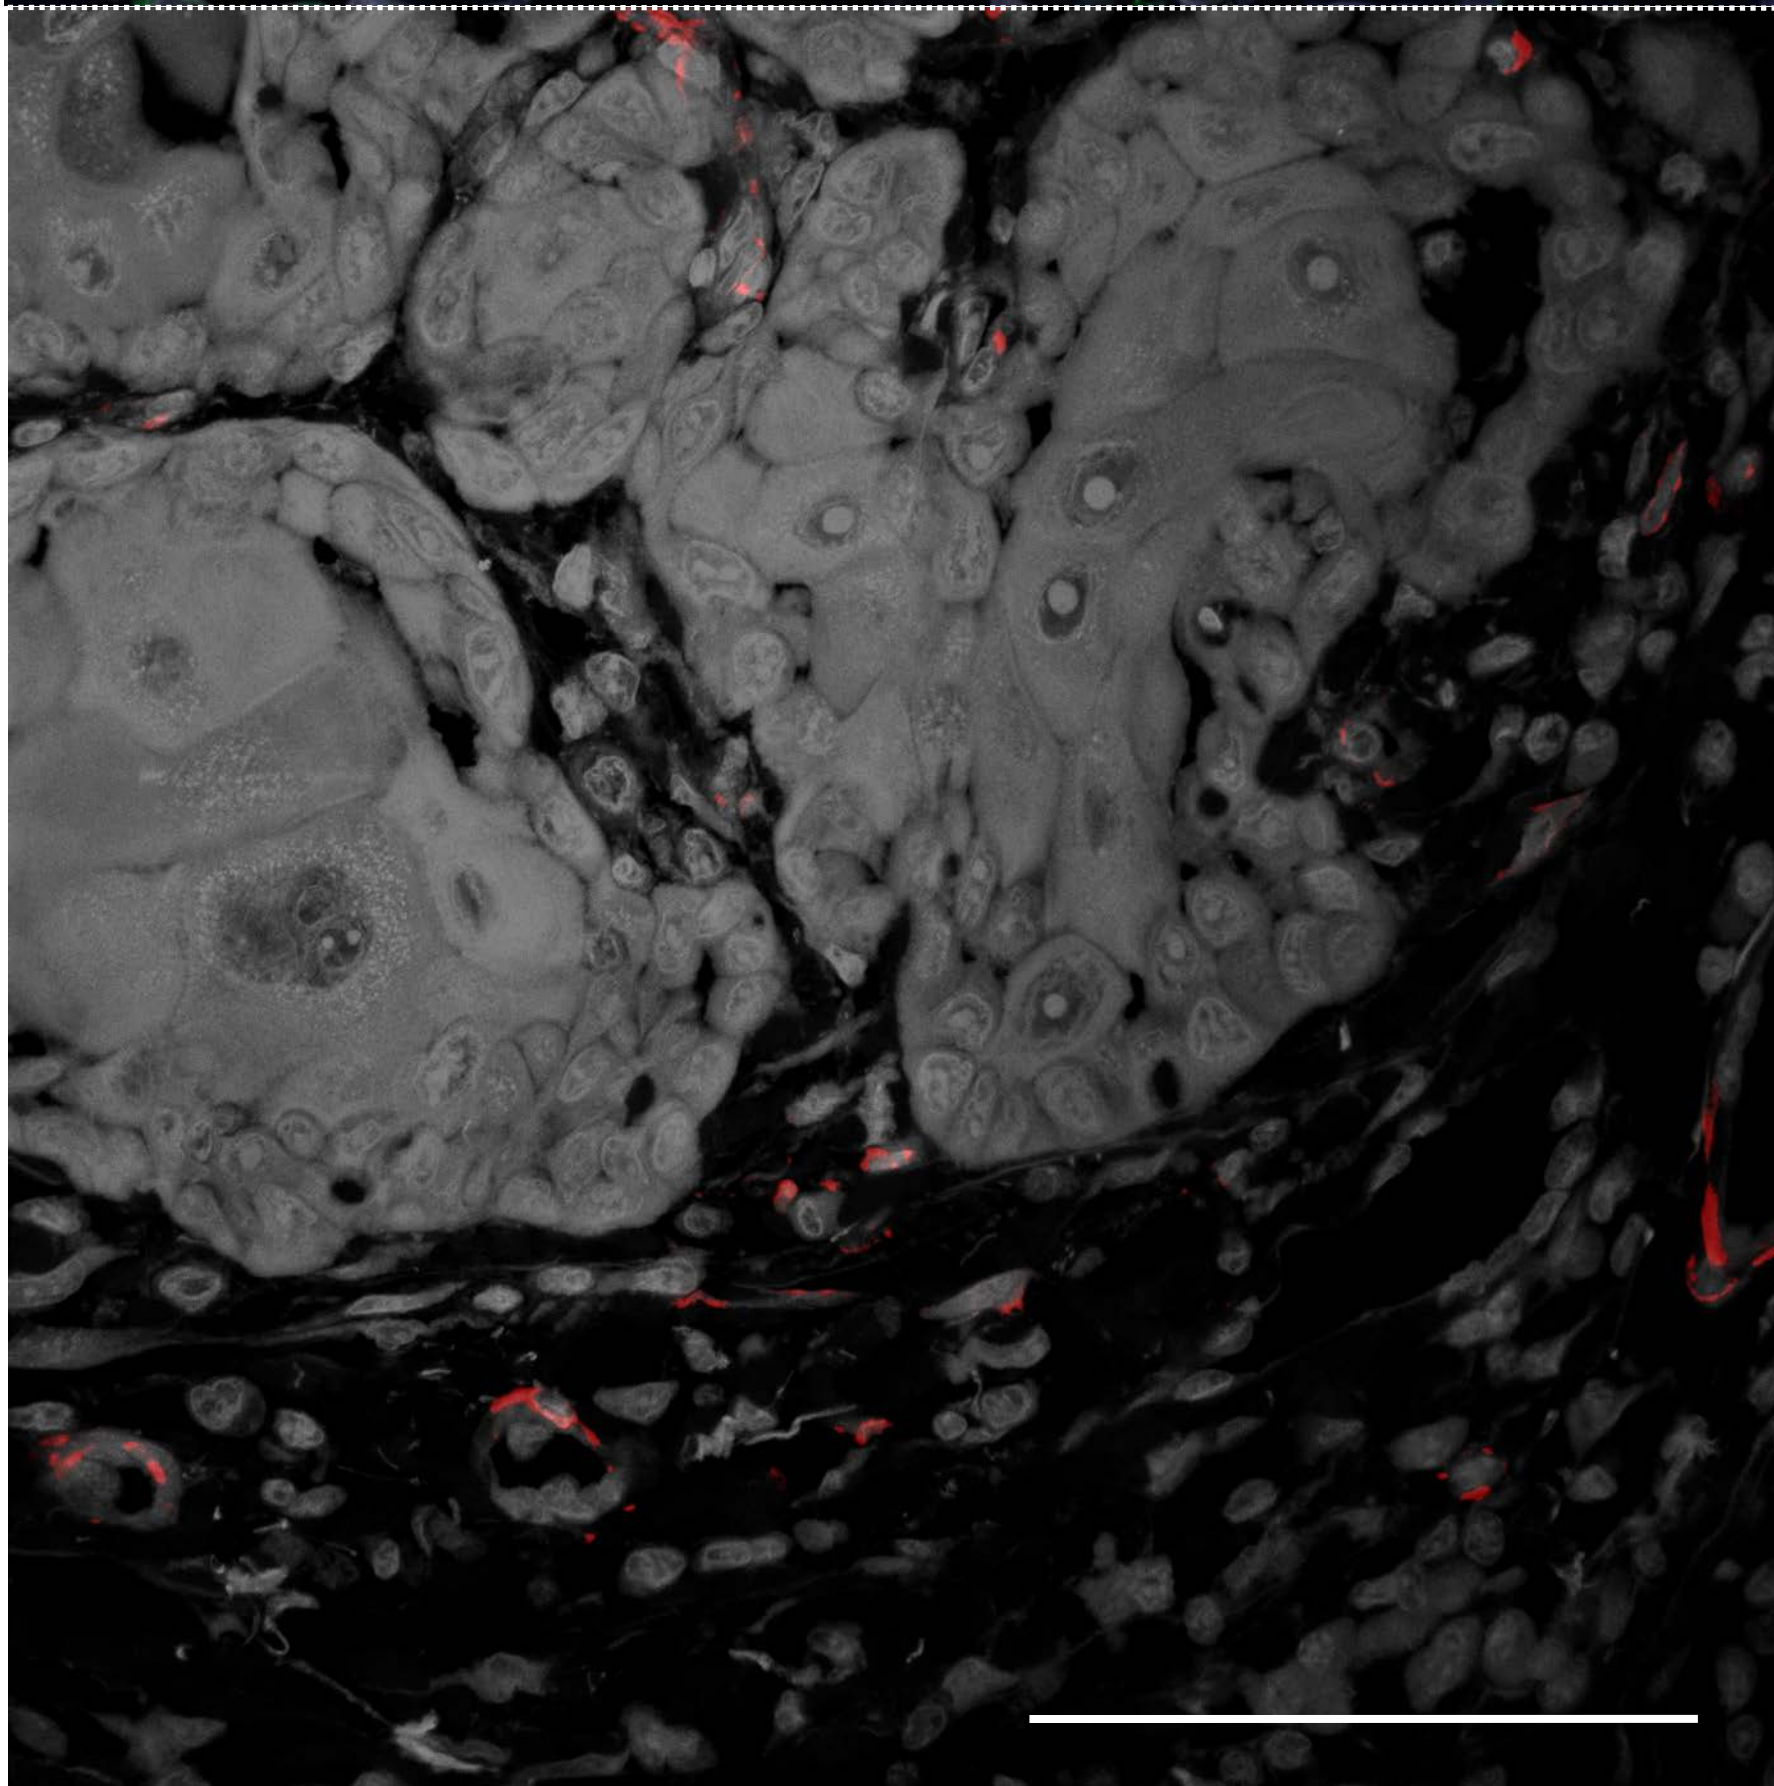**c** PDGFR $\beta$ /DAPI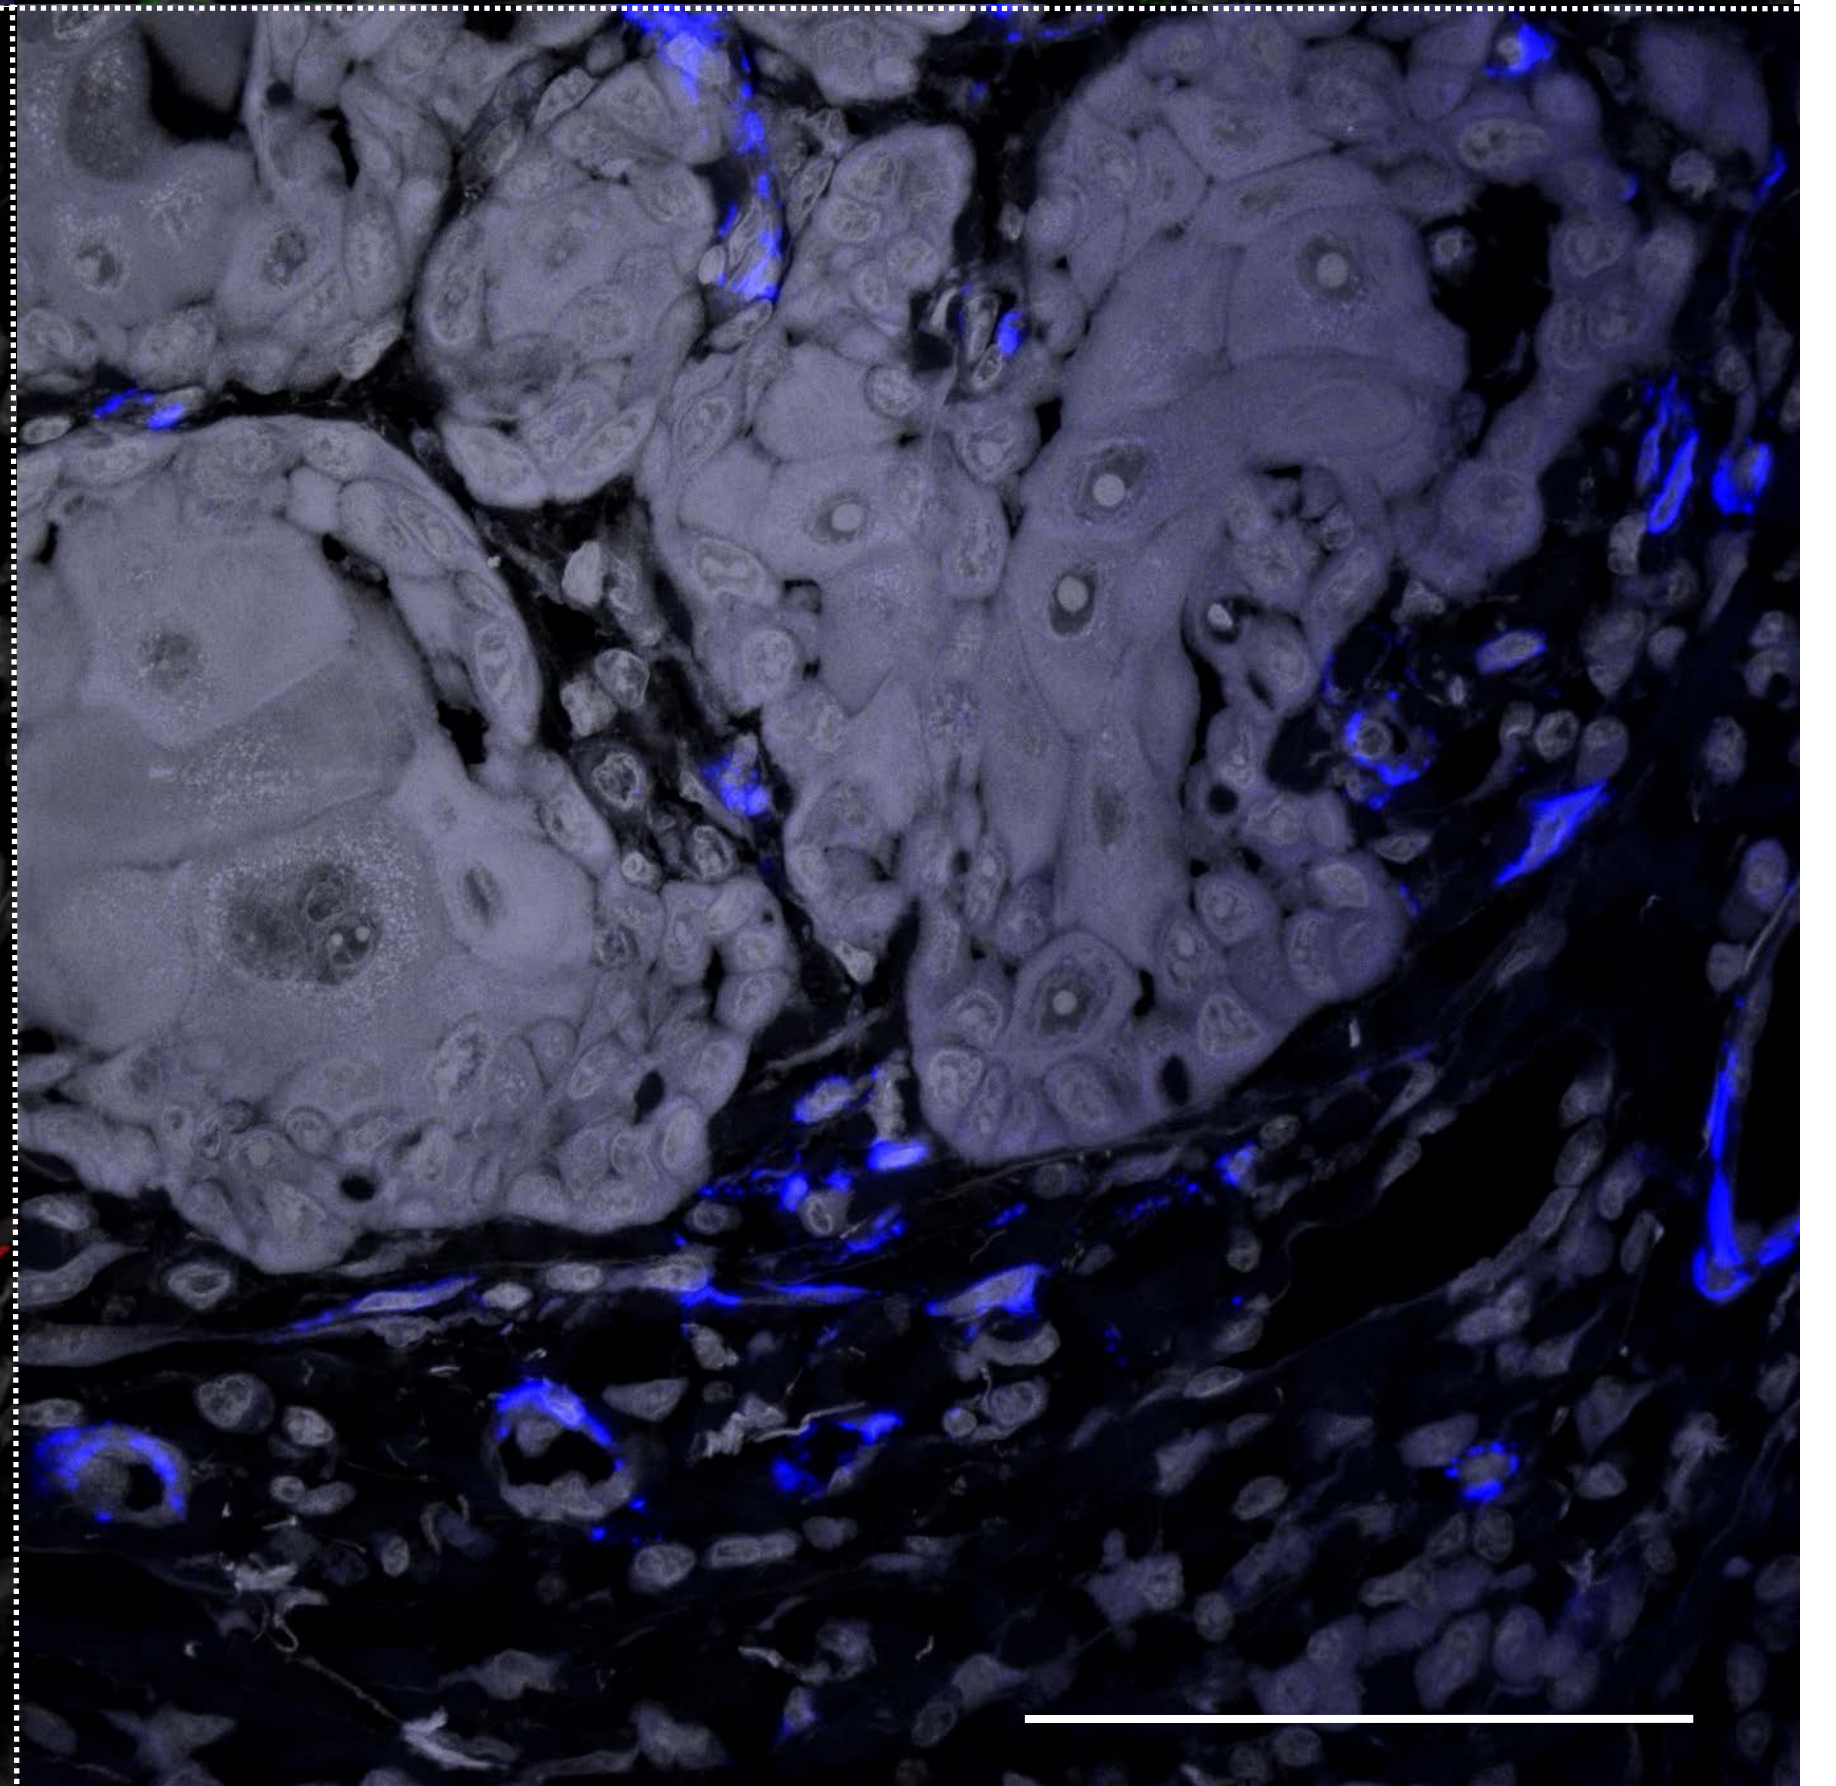**d**  $\alpha$ SMA/DAPI**e** PDGFR $\beta$ /X/Y/DAPI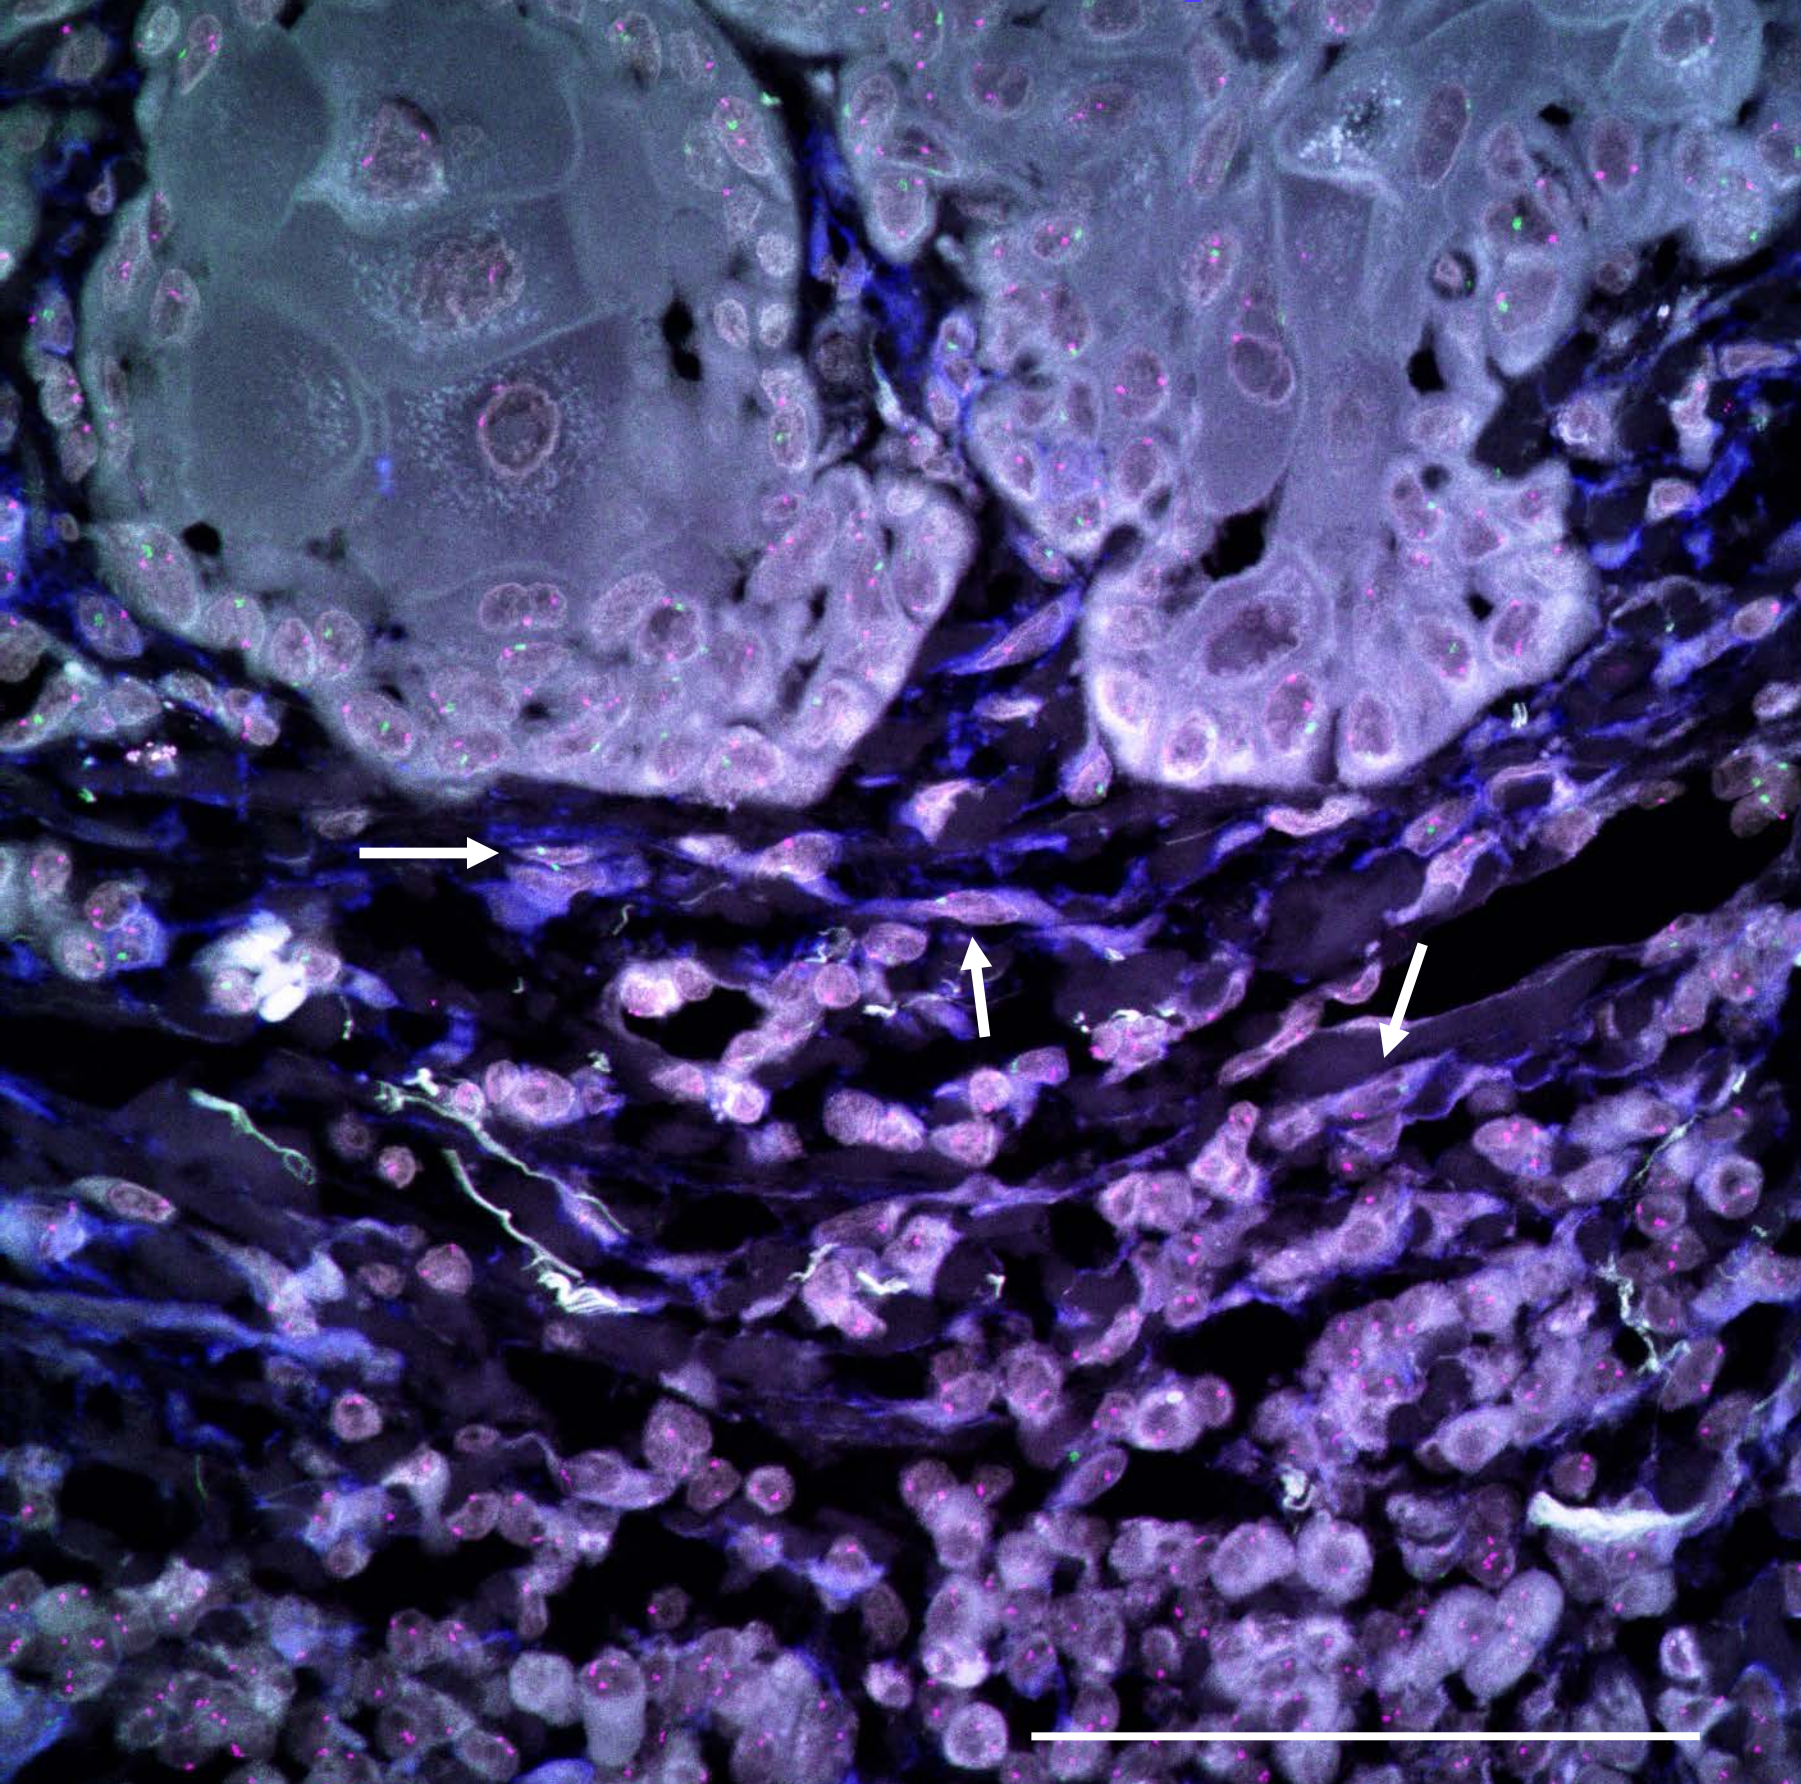

Supplementary Fig. 3 Triple immunostaining and immunoFISH for bone marrow stromal cell markers in case 3.

a–d, Triple immunostaining for  $\alpha$ SMA, HLA-DR, and PDGFR $\beta$ . 97% of 115  $\alpha$ SMA(+) SCSSNs in 10 HPFs also expressed PDGFR $\beta$ . PDGFR $\beta$ (+)  $\alpha$ SMA(-) SCSSNs and  $\alpha$ SMA(+) HLA-DR(+) SCSSNs were sparse (< 1% of the PDGFR $\beta$ (+)SCSSNs,  $\alpha$ SMA(+)SCSSNs in 10 HPFs, respectively; > 100 cells were analyzed).  $\alpha$ SMA, blue; PDGFR $\beta$ , red; HLA-DR, green; DAPI, gray. Scale bar, 100  $\mu$ m.

e, PDGFR $\beta$ -immunoFISH analysis in the tumor specimen. Recipient-derived PDGFR $\beta$ (+) cells are indicated by white arrows. The chimerism rates are shown in Fig. 5b. PDGFR $\beta$ , blue; X, magenta; Y, green; DAPI, gray. Scale bar, 100  $\mu$ m.

**a**  $\alpha$ SMA/HLA-DR/CD68/DAPI**b** $\alpha$ SMA/DAPI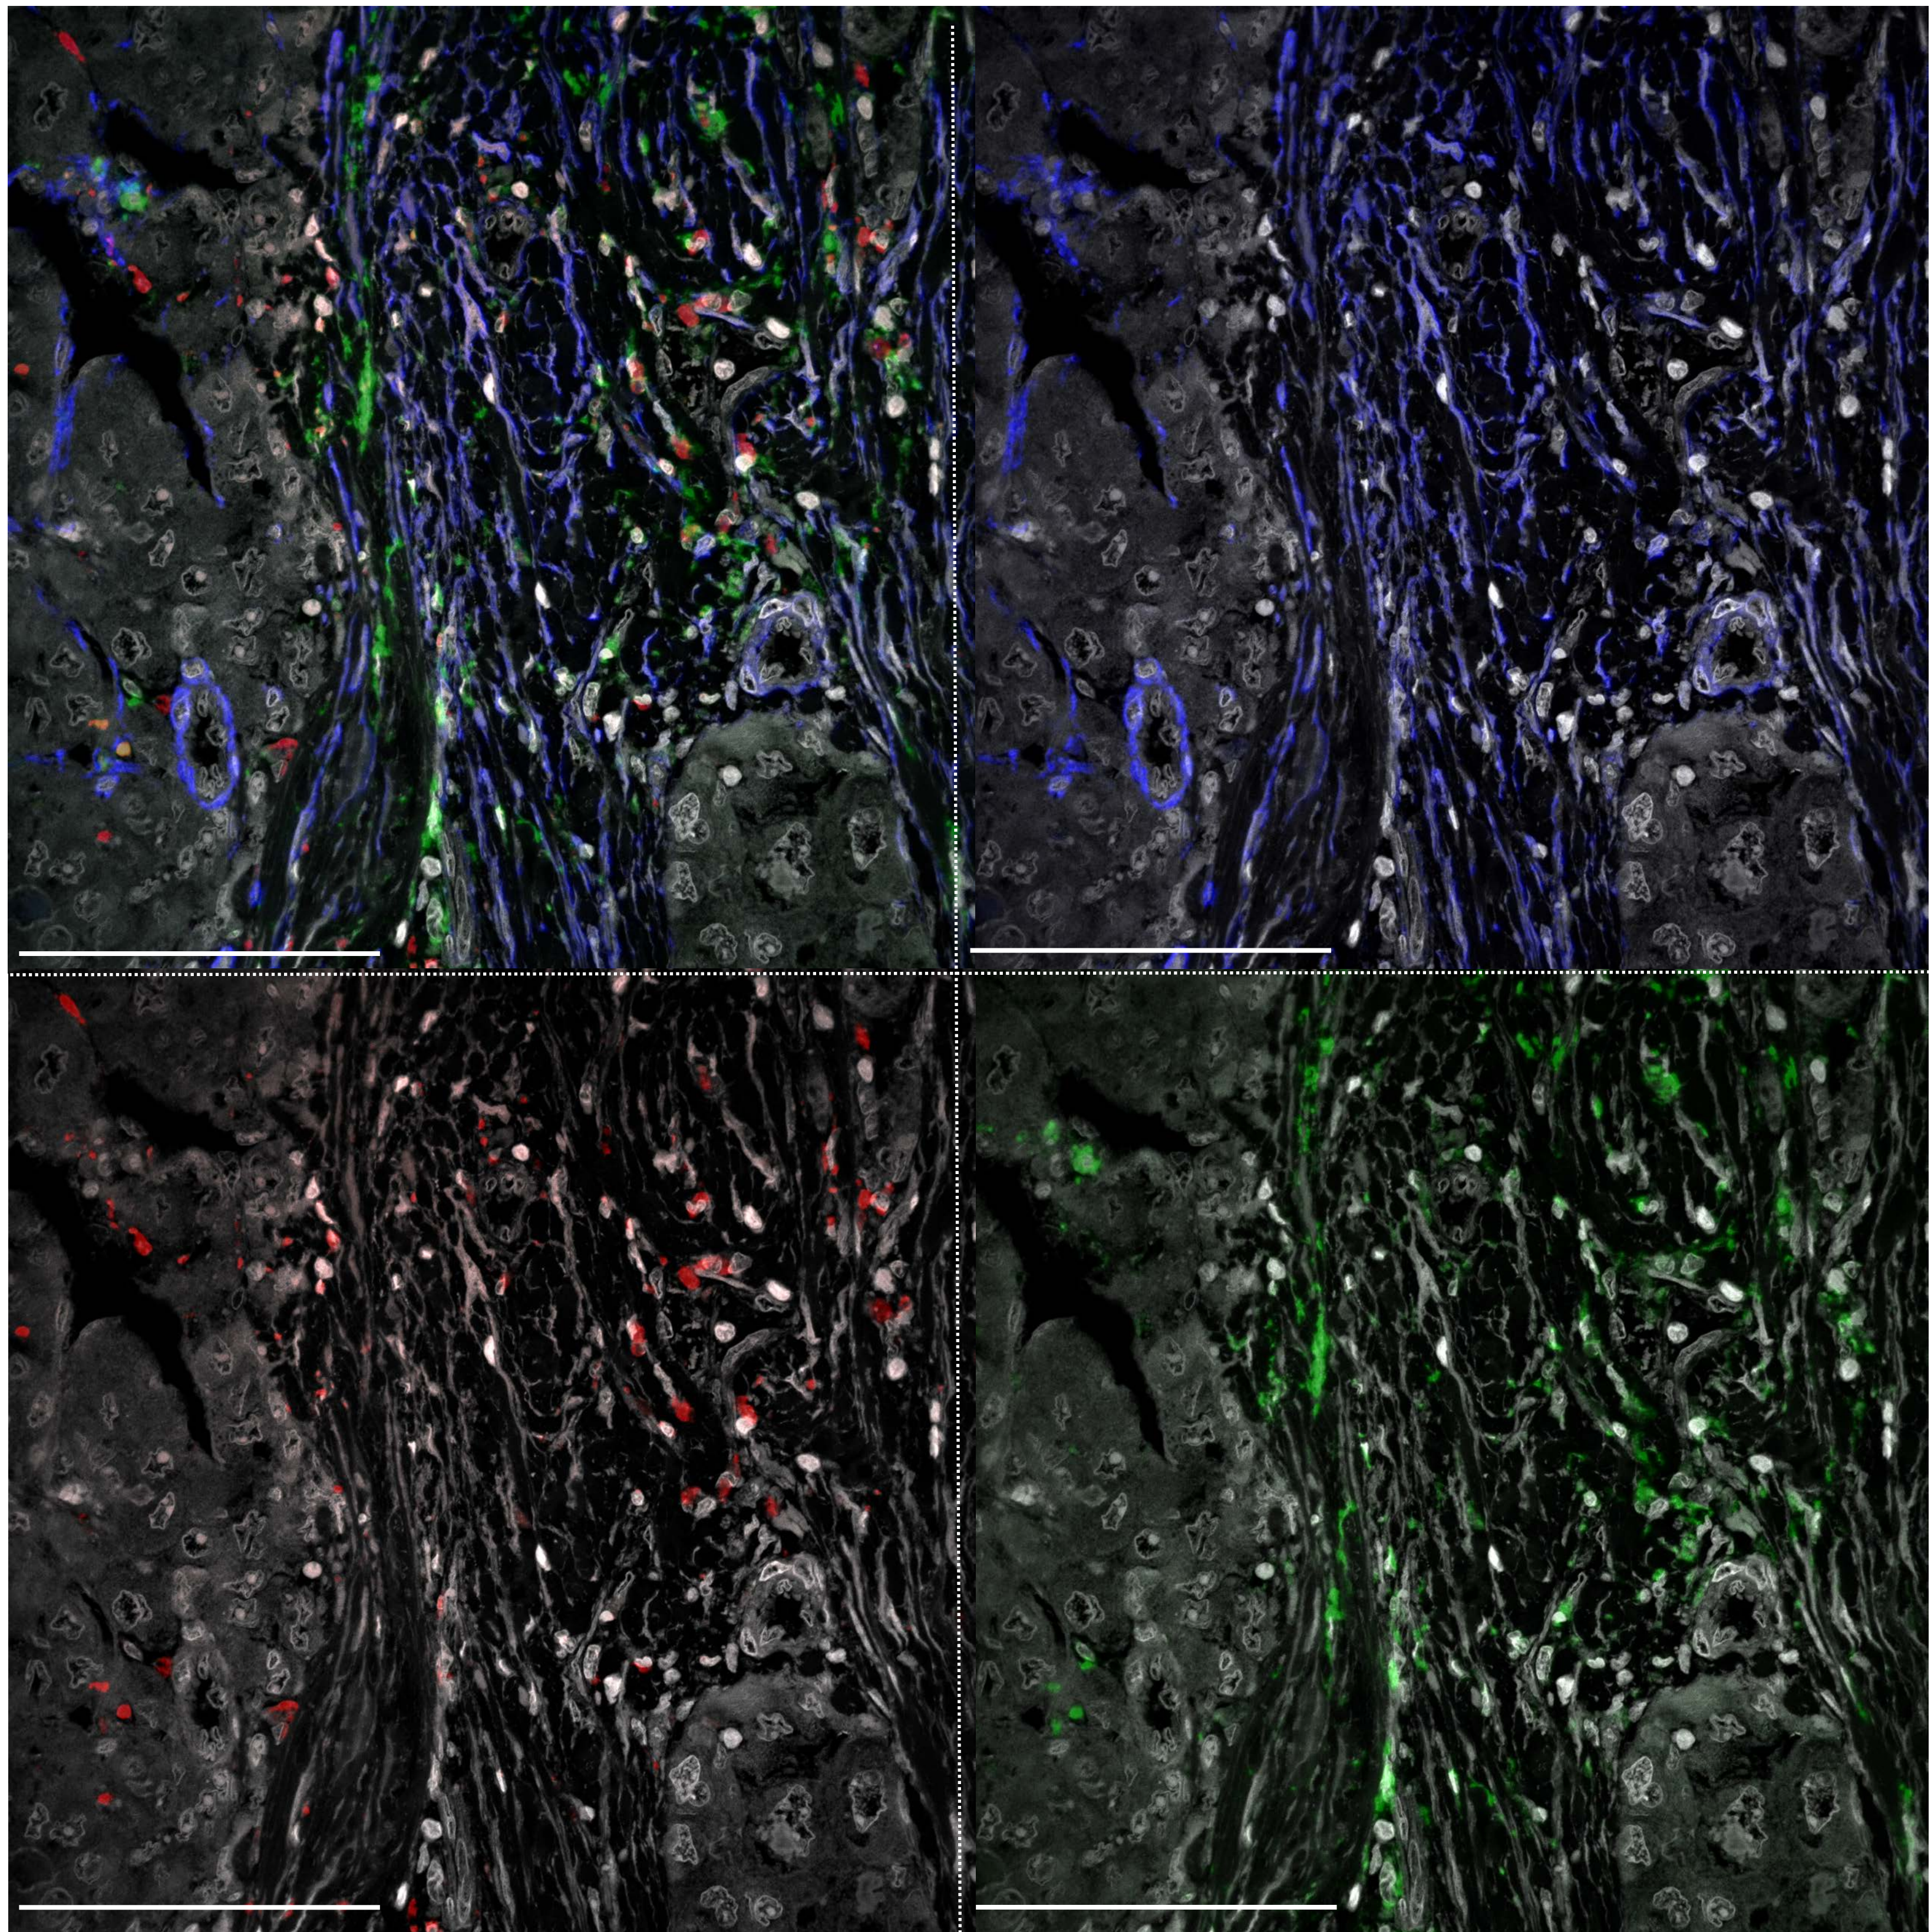**c**

CD68/DAPI

**d**

HLA-DR/DAPI

**e**

HLA-DR/X/Y/DAPI

**f** $\alpha$ SMA/HLA-DR/X/Y/DAPI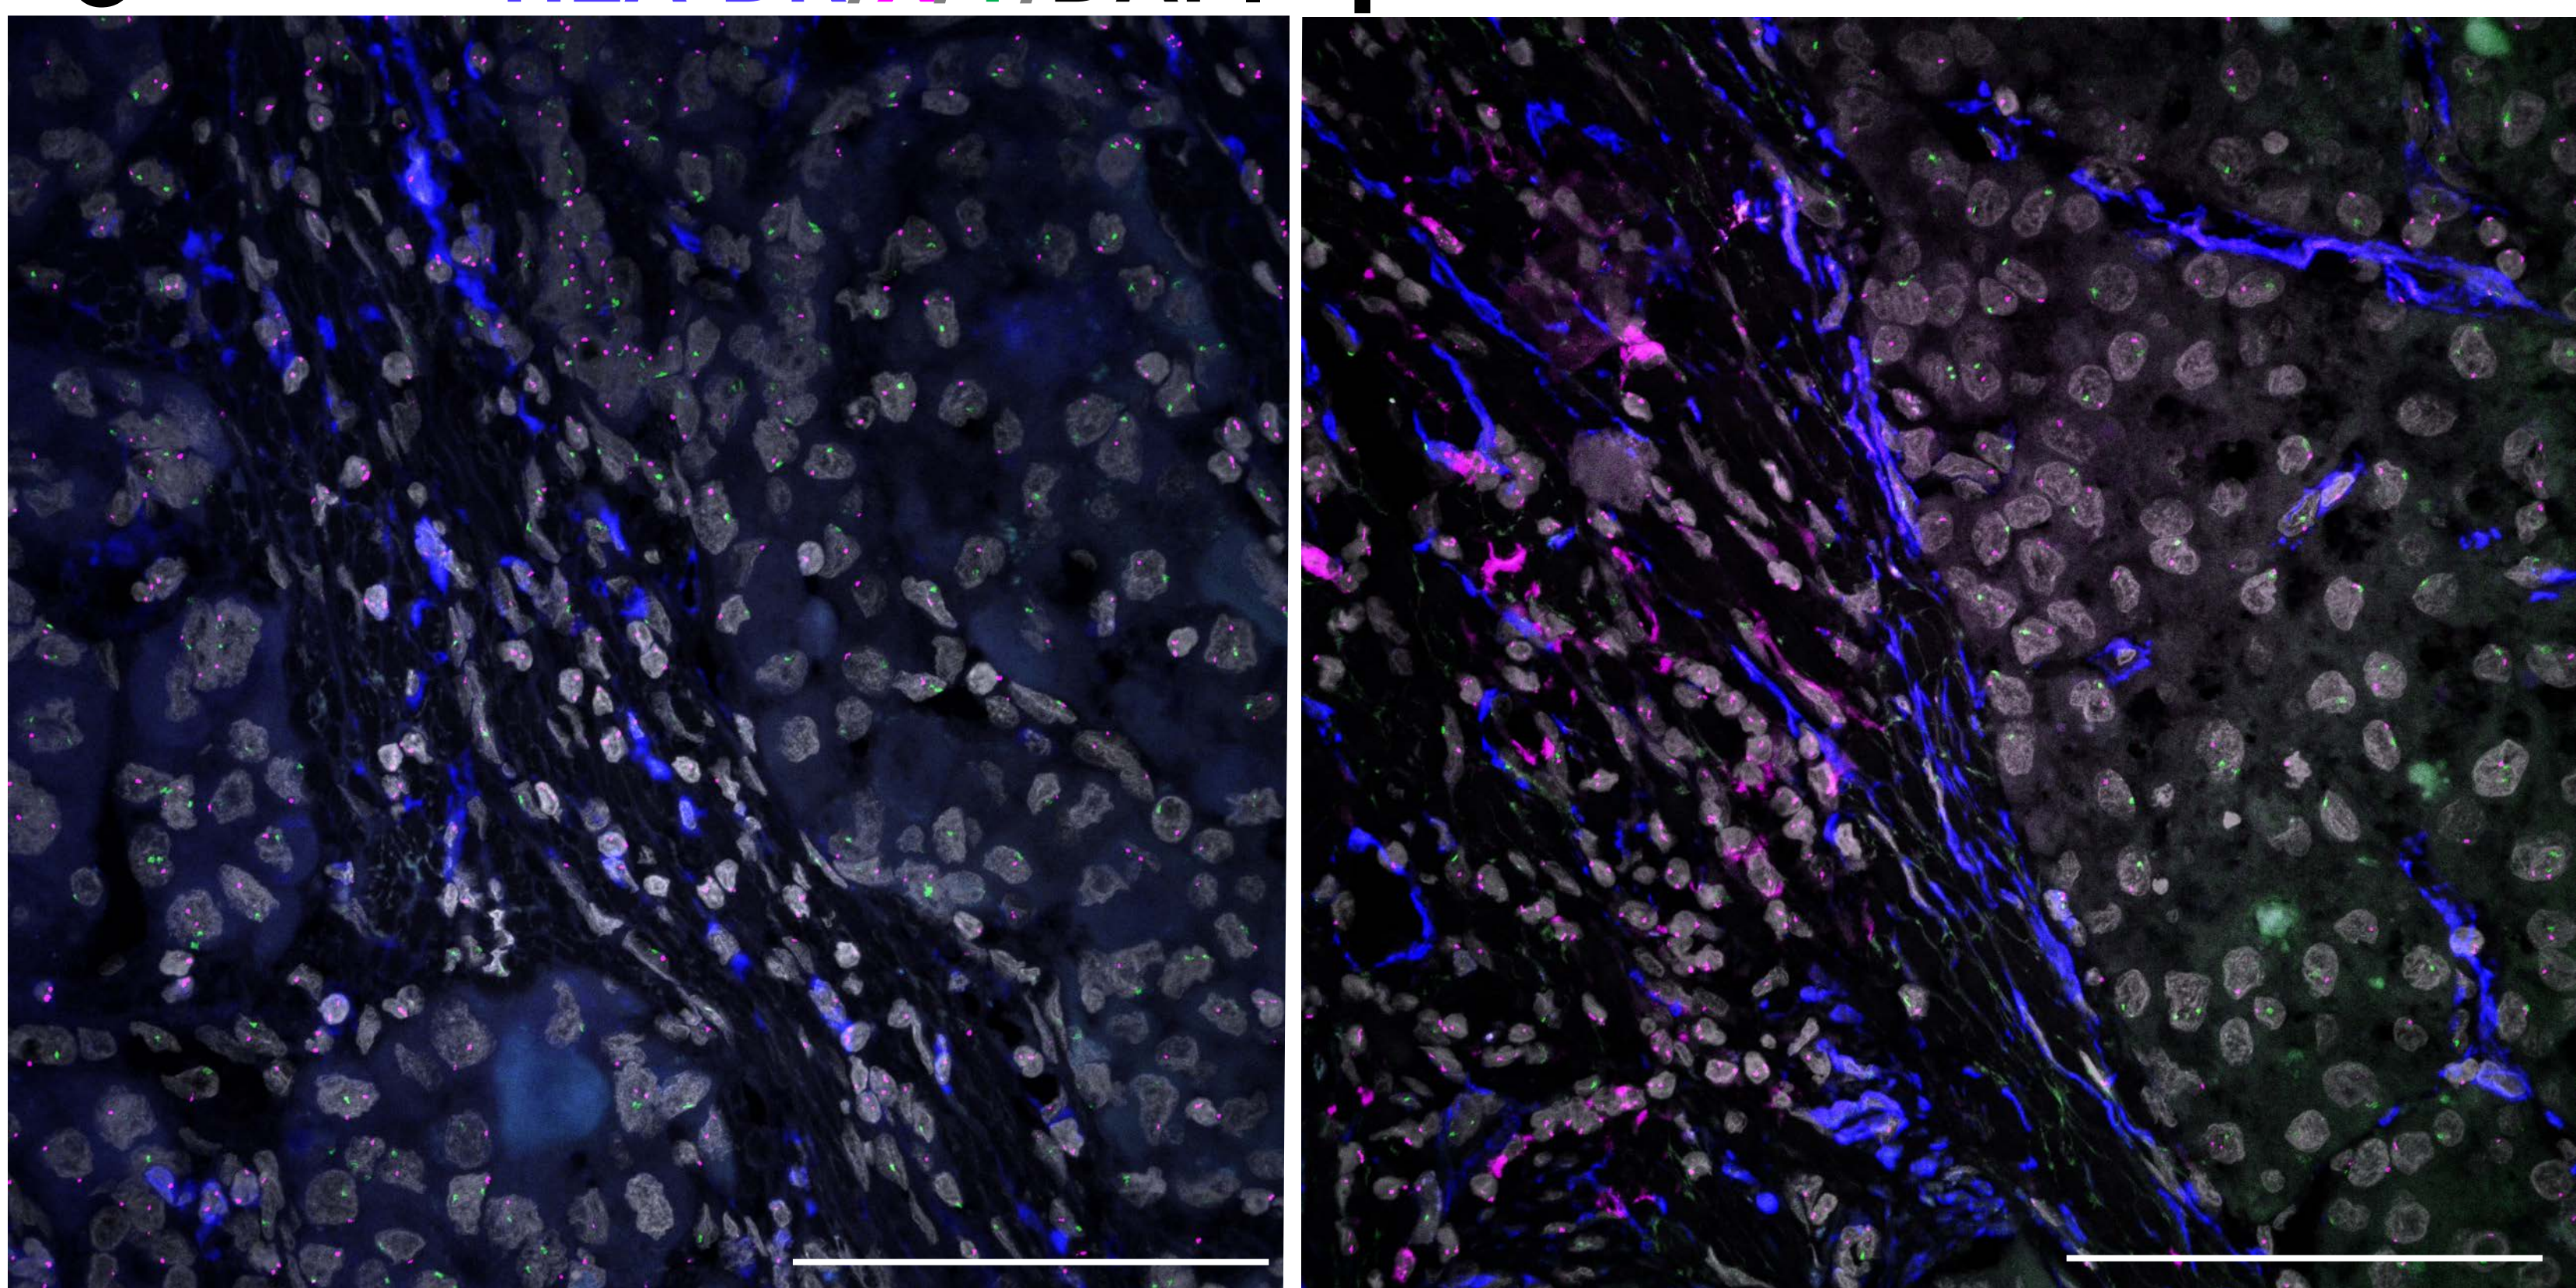

Supplementary Fig. 4. Triple immunostaining and immunoFISH with double immunostaining for macrophage and dendritic cell markers in case 2. a–d, Triple immunostaining for  $\alpha$ SMA, HLA-DR, and CD68. Scale bar, 100  $\mu$ m. d 73% of 158  $\alpha$ SMA(-) SCSSNs were HLA-DR(+) and 72% of 116 HLA-DR(+) SCSSNs were CD68(+) cells. (in 10 HPFs).  $\alpha$ SMA, blue; CD68, red; HLA-DR, green; DAPI, gray. Scale bar, 100  $\mu$ m. e, HLA-DR-immunoFISH. Almost all HLA-DR(+) SCSSNs originated from the donor. The proportions of donor cells are shown in Fig. 7b. HLA-DR, blue; X, magenta; Y, green; DAPI, gray. Scale bar, 100  $\mu$ m. f, ImmunoFISH for  $\alpha$ SMA and HLA-DR.  $\alpha$ SMA, blue; HLA-DR, magenta; X, magenta; Y, green; DAPI, gray. Scale bar, 100  $\mu$ m.

**a**  $\alpha$ SMA/HLA-DR/CD68/DAPI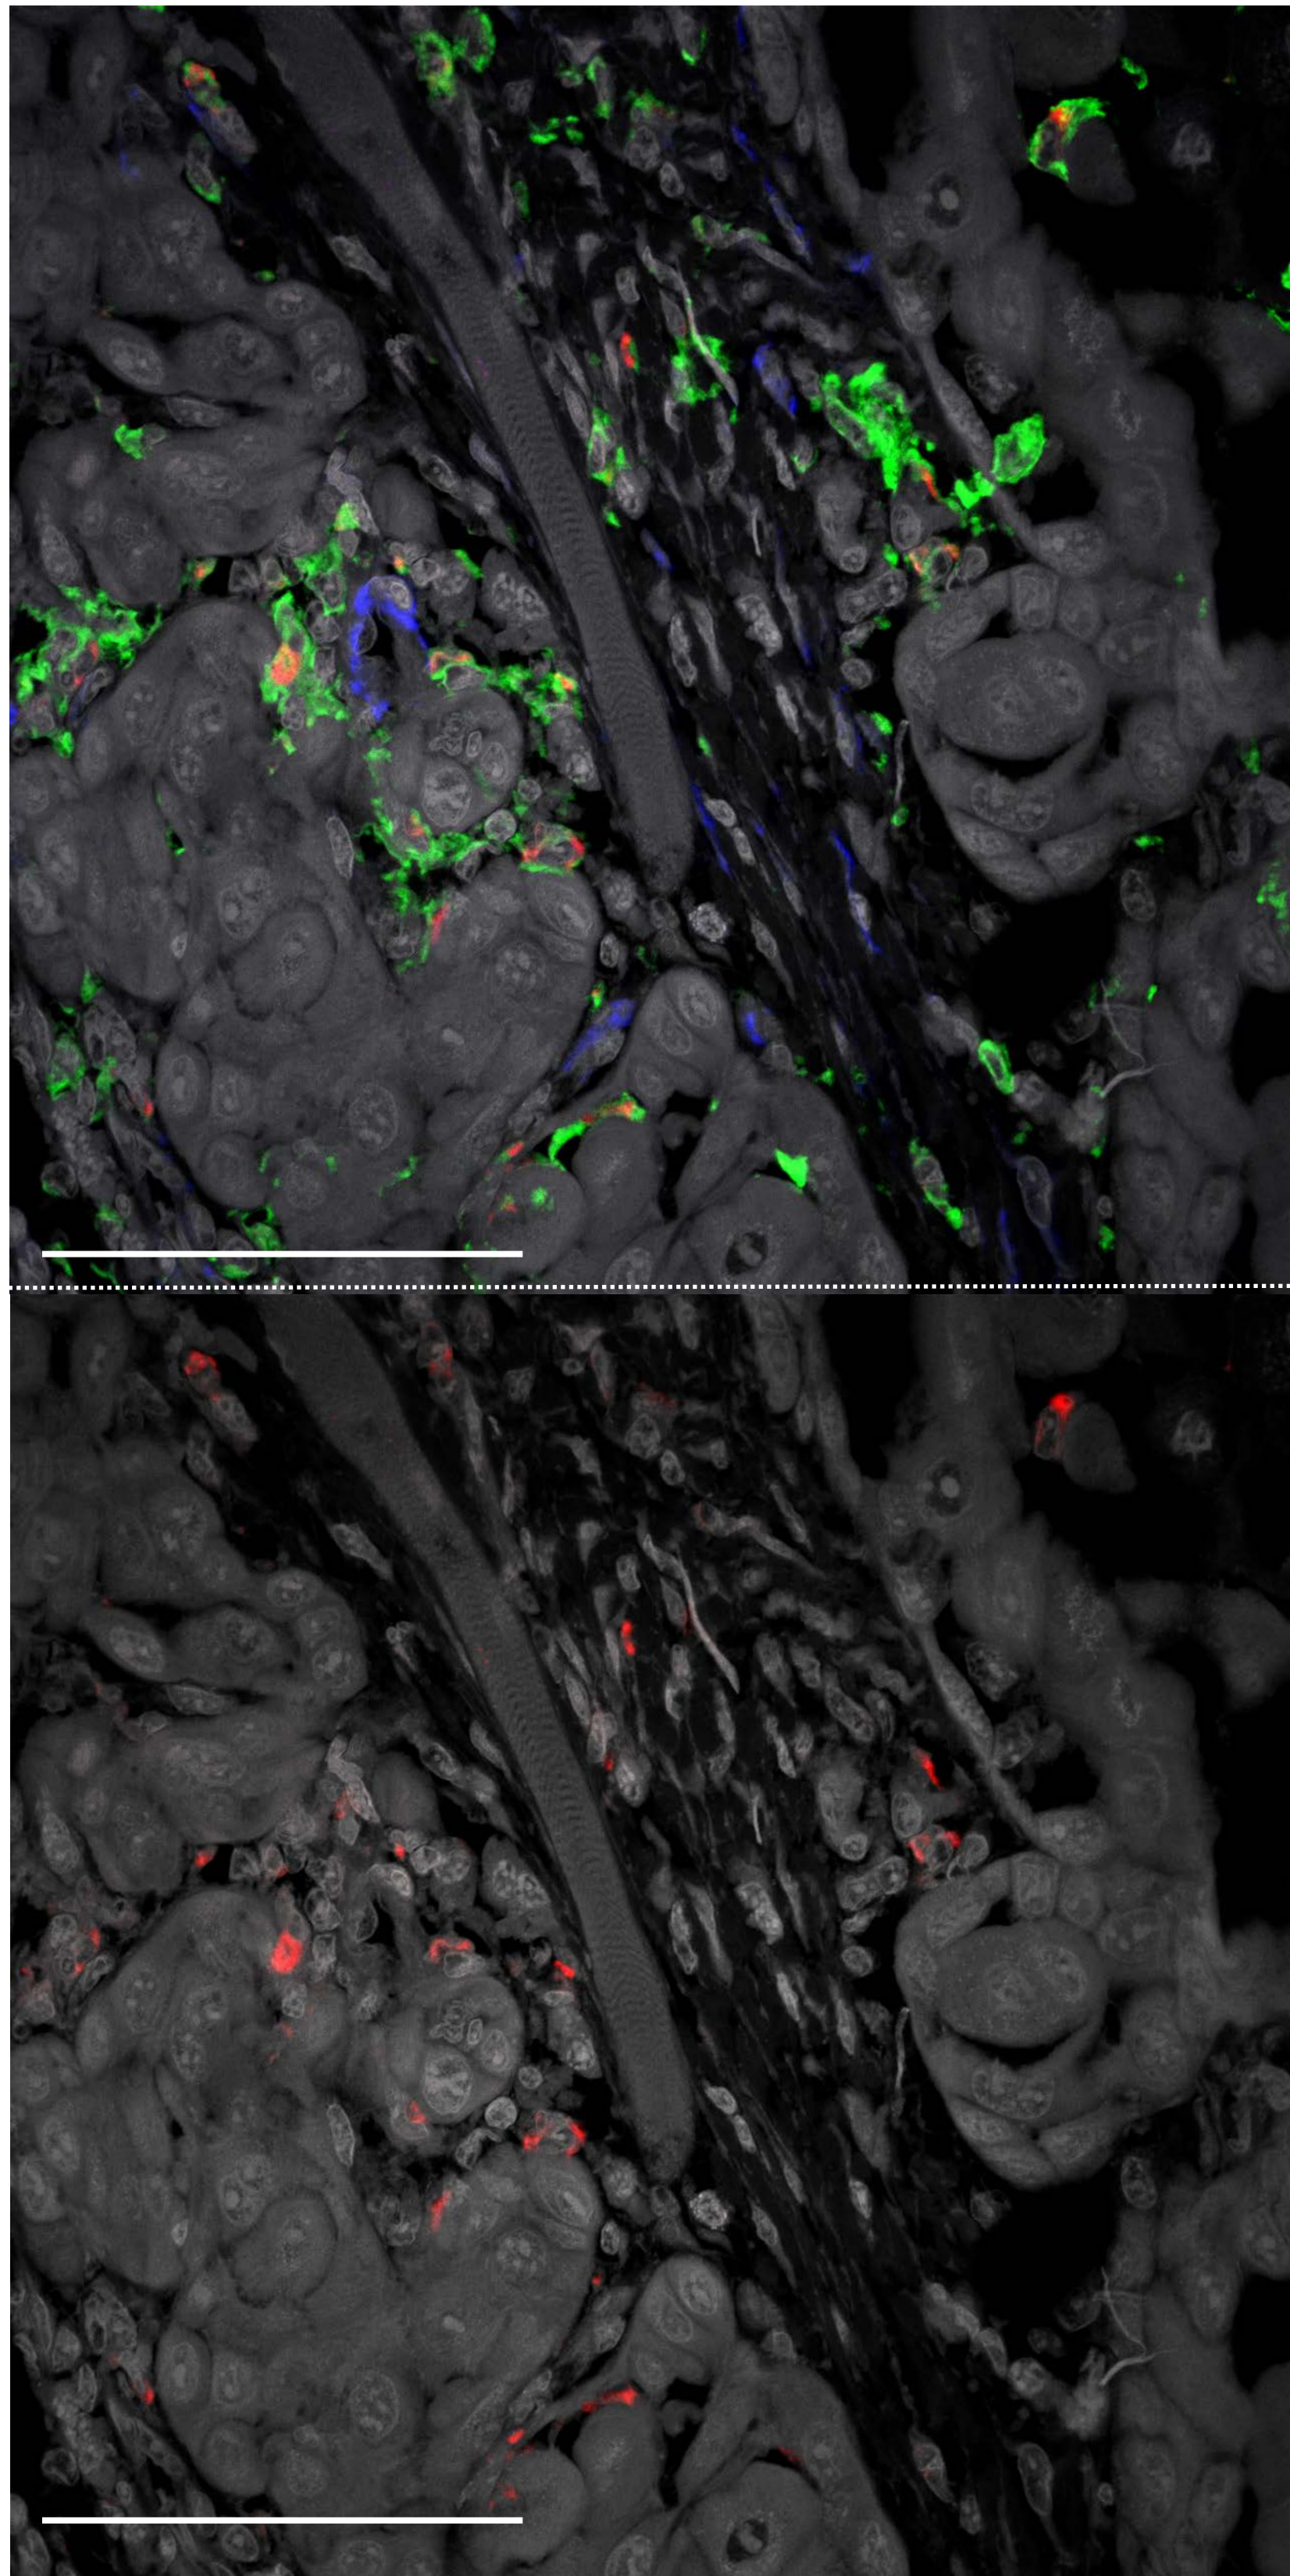**b** $\alpha$ SMA/DAPI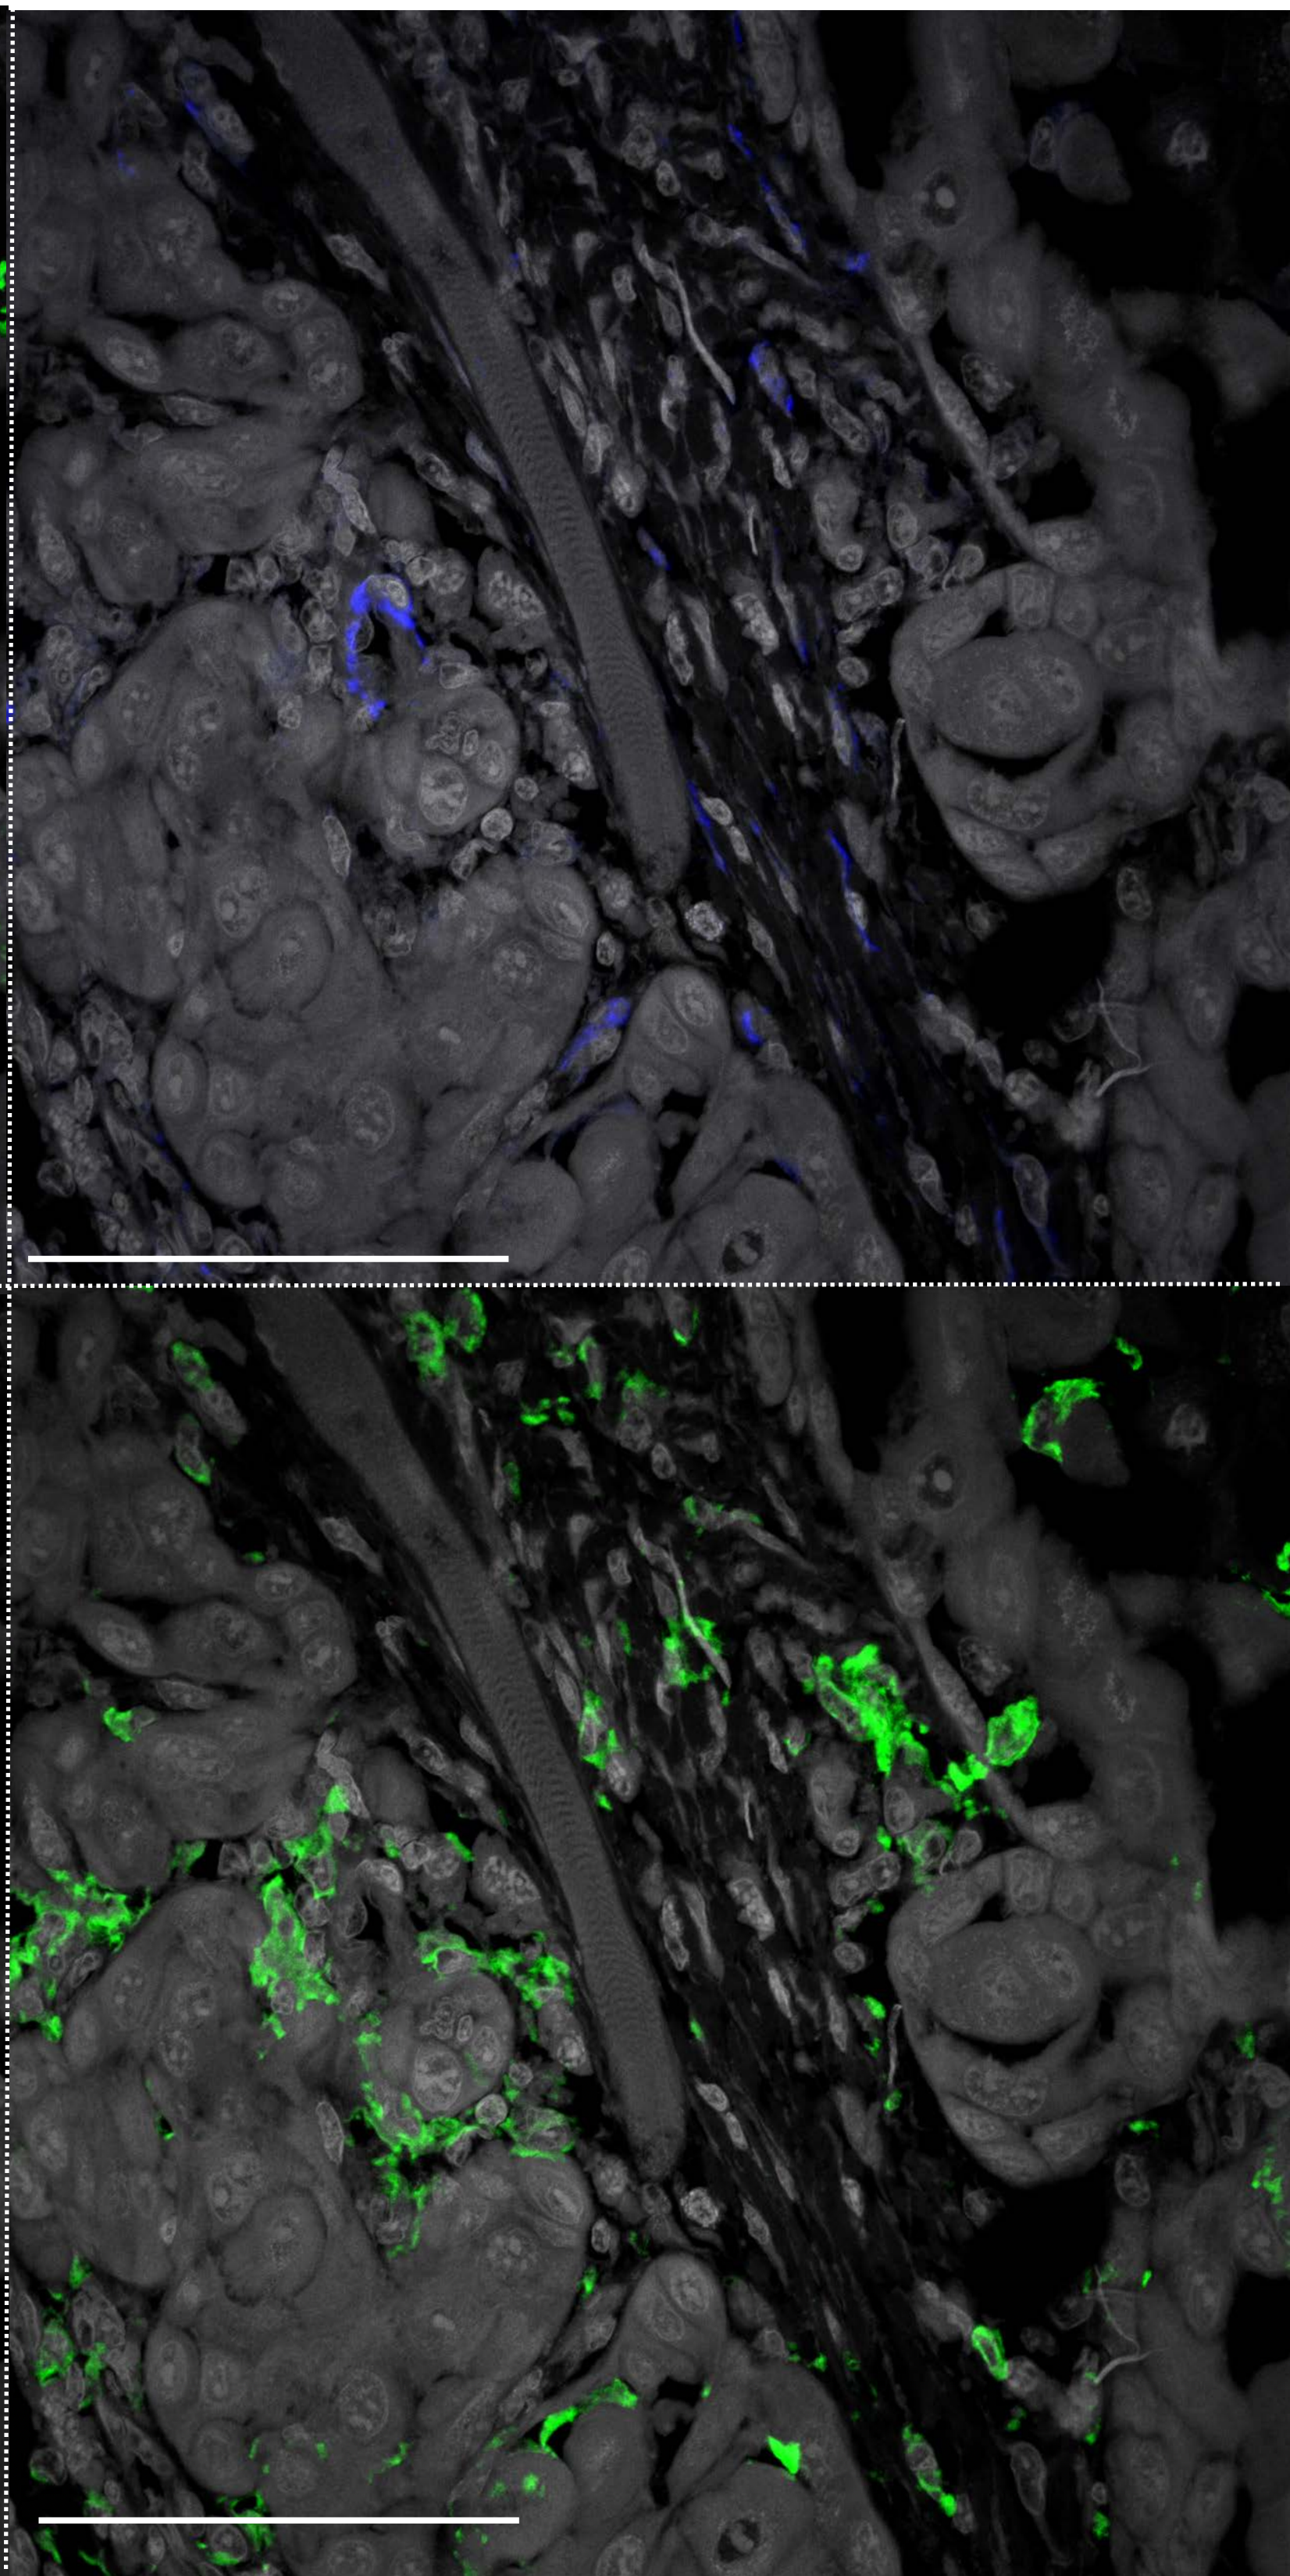**c**

CD68/DAPI

**d**

HLA-DR/DAPI

**e**

HLA-DR/X/Y/DAPI

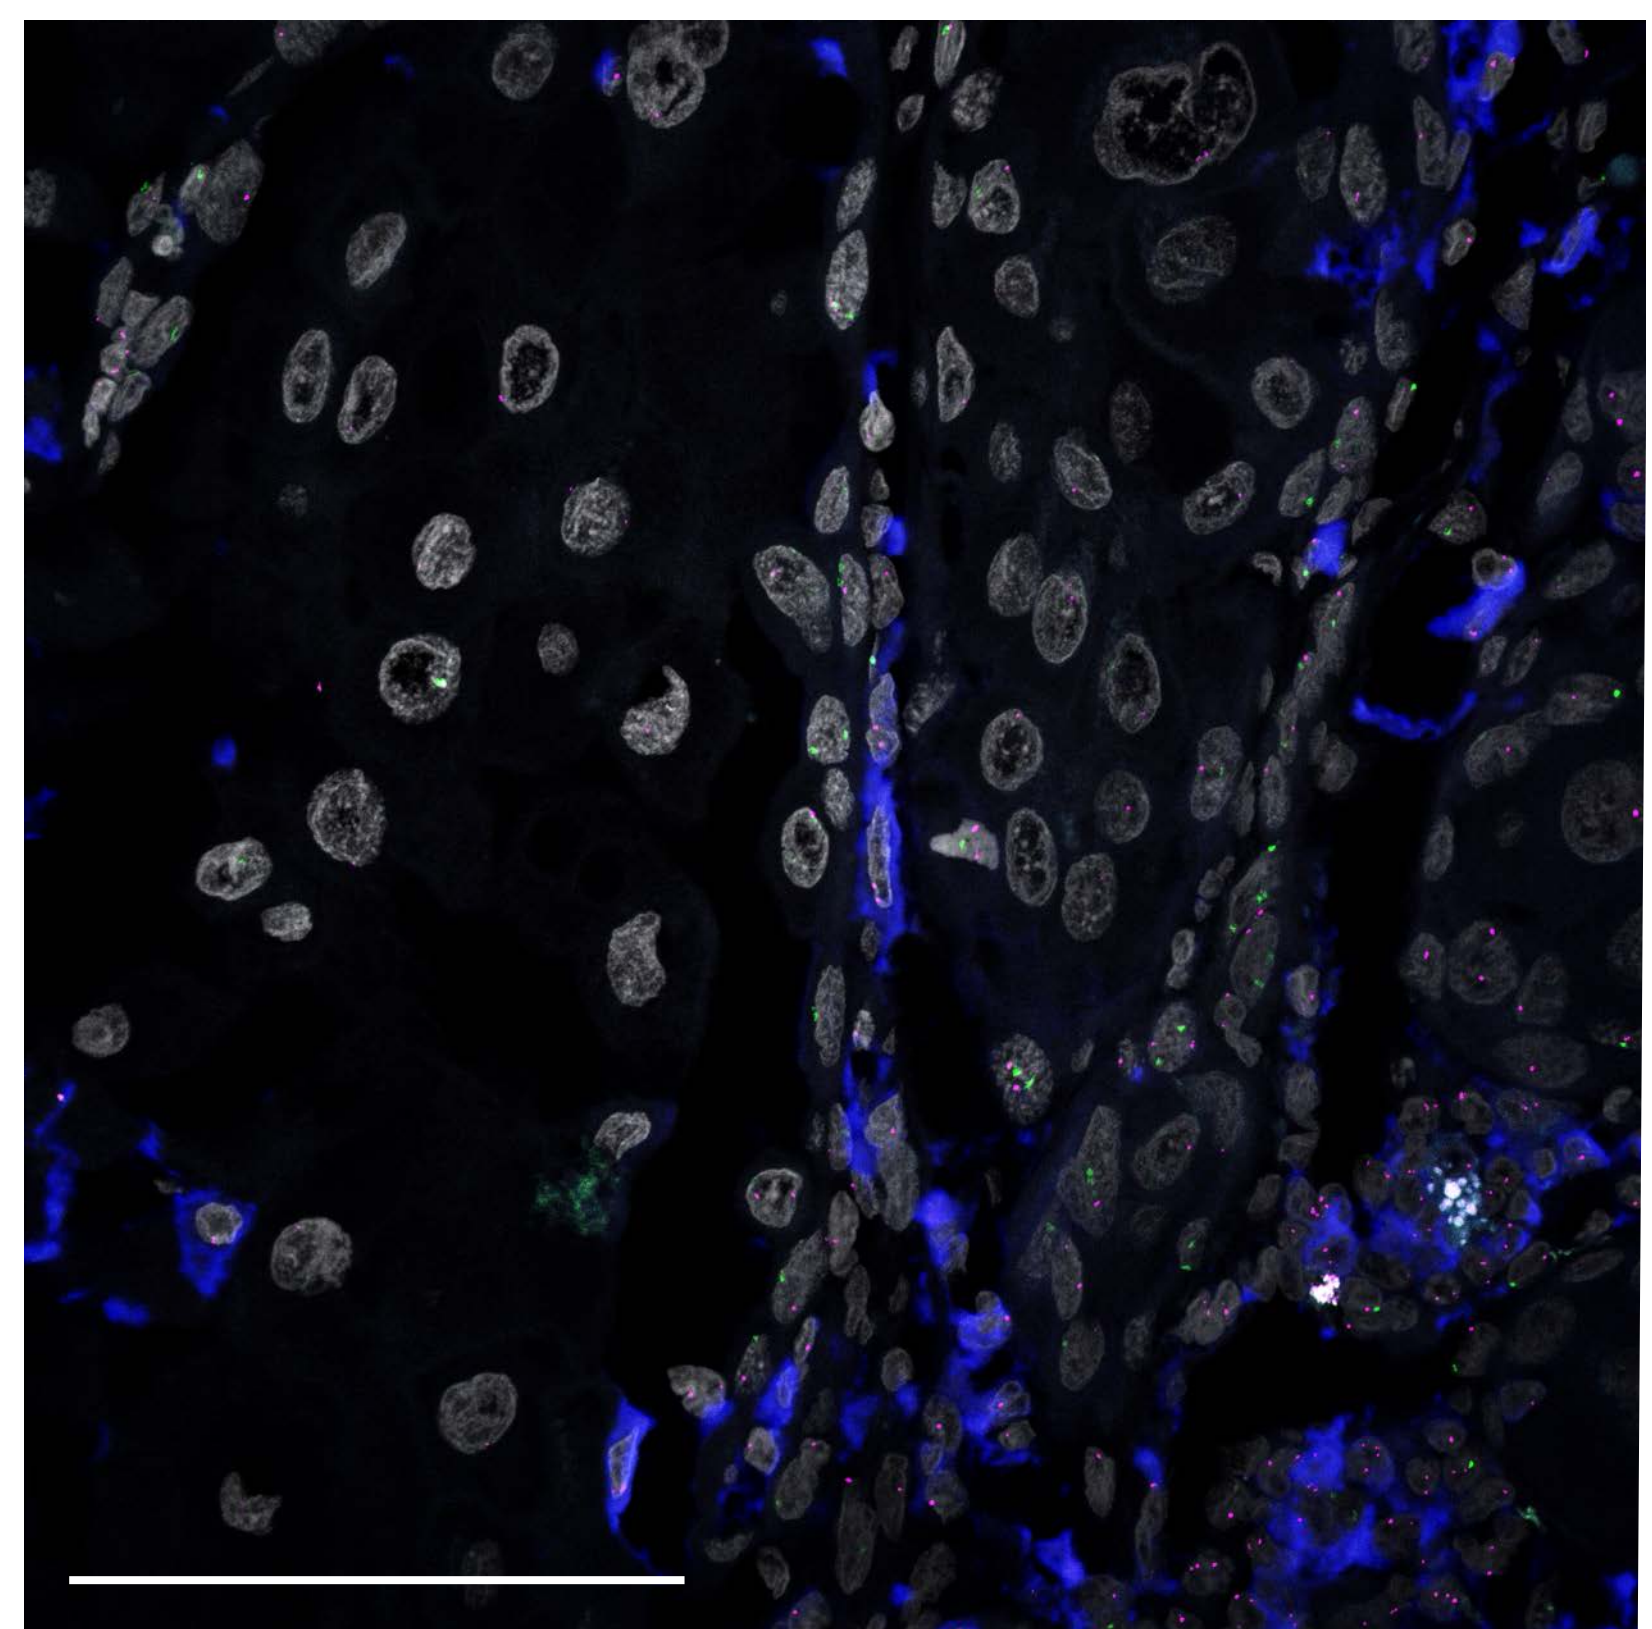**f** $\alpha$ SMA/HLA-DR/X/Y/DAPI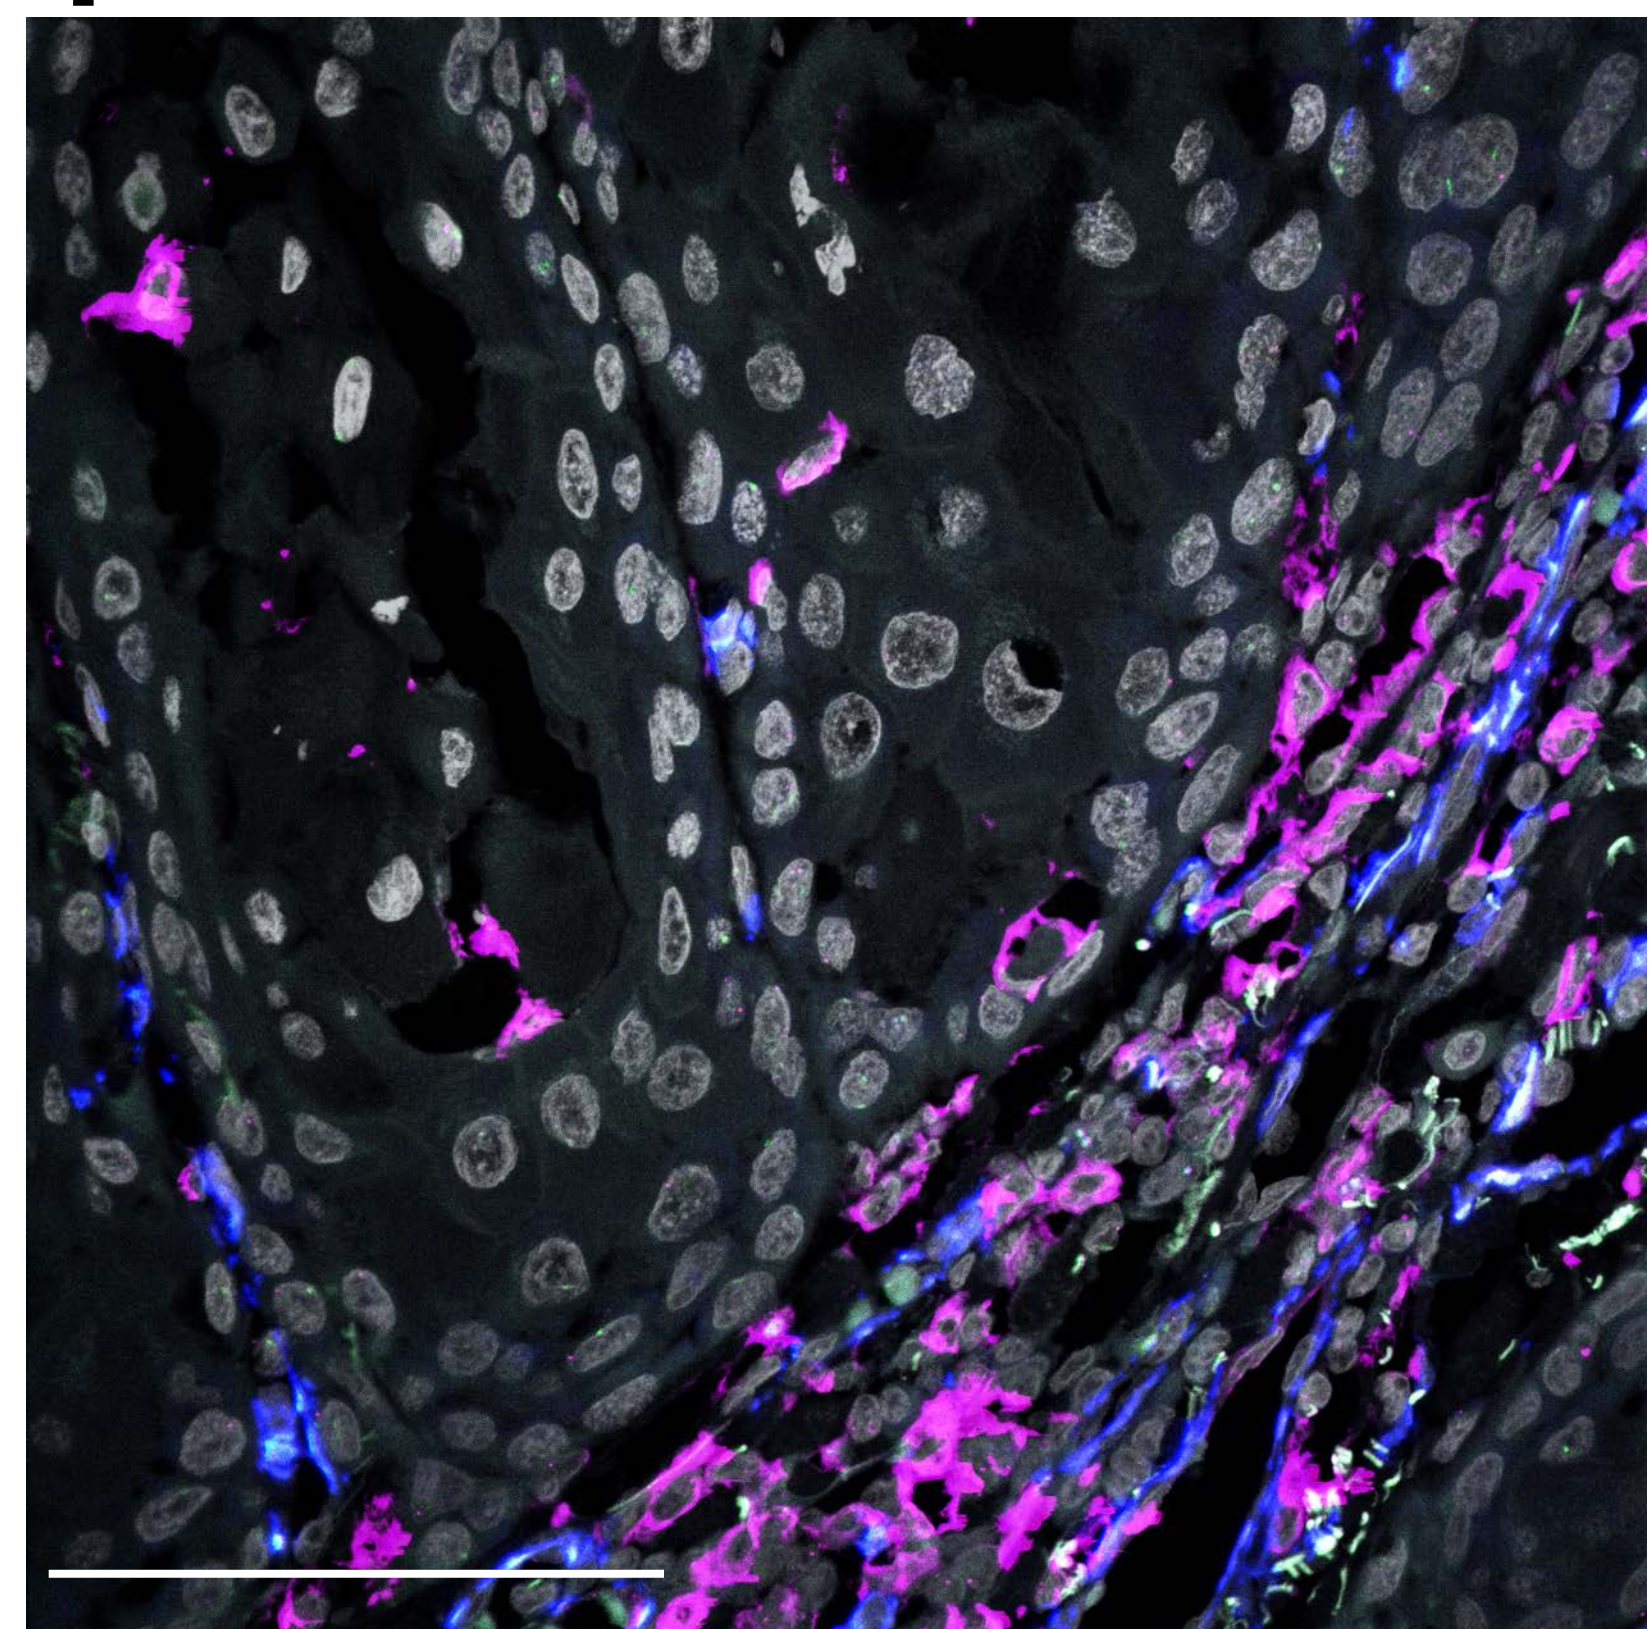

Supplementary Fig. 5. Triple immunostaining and immunoFISH with double immunostaining for macrophage and dendritic cell markers in case 3.

a–d, Triple immunostaining for  $\alpha$ SMA, HLA-DR, and CD68. 76% of 141  $\alpha$ SMA(-) SCSSNs were HLA-DR(+) and 81% of 107 HLA-DR(+) SCSSNs were CD68(+) cells. (in 10 HPFs).  $\alpha$ SMA, blue; CD68, red; HLA-DR, green; DAPI, gray. Scale bars, 100  $\mu$ m.

e, HLA-DR-immunoFISH image. The proportions of donor cells are shown in Fig. 7b. HLA-DR, blue; X, magenta; Y, green; DAPI, gray. Scale bar, 100  $\mu$ m.

f, ImmunoFISH for  $\alpha$ SMA and HLA-DR.  $\alpha$ SMA, blue; HLA-DR, magenta; X, magenta; Y, green; DAPI, gray. Scale bar, 100  $\mu$ m.

| Sample                                            | Number of CD163(+) cells analyzed | Number of HPFs (sections) analyzed | Number of Bone marrow-derived CD163(+) cells | Bone marrow-derived CD163(+) cells (percent) |
|---------------------------------------------------|-----------------------------------|------------------------------------|----------------------------------------------|----------------------------------------------|
| Case 1, breast carcinoma (tumor area)             | 321                               | 76 (2)                             | 321                                          | 100.0%                                       |
| Case 1, Mammary gland tissue (non-tumor area)     | 302                               | 148 (2)                            | 302                                          | 100.0%                                       |
| Case 2, Hepatocellular carcinoma (tumor area)     | 302                               | 101 (3)                            | 301                                          | 99.7%                                        |
| Case 2, Liver tissue (non-tumor area)             | 412                               | 136 (3)                            | 410                                          | 99.5%                                        |
| Case 3, Oral squamous cell carcinoma (tumor area) | 324                               | 36 (2)                             | 324                                          | 100.0%                                       |
| Case 3, Oral mucosa (non-tumor area)              | 301                               | 65 (2)                             | 301                                          | 100.0%                                       |

Supplementary Table 1. CD163-immunoFISH data in Cases 1–3.
